# Supplementary material for: Electrochemical engineering for phase-controlled exfoliation of transition metal dichalcogenides
Source: Research Square preprint supplement (doi:10.21203/rs.3.rs-6516593/v1), 2025-05-22
Supplement: Supplementary file 1 [file 6f9ec01f79dcbc3809e5b624.docx]

**Supporting Information**

Electrochemical engineering for phase-controlled exfoliation of transition metal dichalcogenides

Honglu Hu1, Mingzi Sun2, Qiang Zhang2, Zheng Zhang1, Xinru Yang1, Ruixin Yan1, Liang Mei 1, Ting Ying1, Yue Zhang1, Weikang Zheng1, Damien Voiry3, Yang Chai4, Ruquan Ye2, Bolong Huang2, Xiao Zhang5, Bilu Liu6, Bin Liu1, Kian Ping Loh7, Ju Li8*, Zhiyuan Zeng1,9*

1 Department of Materials Science and Engineering and State Key Laboratory of Marine Pollution, City University of Hong Kong, Hong Kong, People’s Republic of China

2 Department of Chemistry, City University of Hong Kong, Hong Kong, People’s Republic of China

3 Institut Européen des Membranes, UMR 5635, ENSCM, CNRS, Université Montpellier, Montpellier, France

4 Department of Applied Physics, The Hong Kong Polytechnic University, Hong Kong, People’s Republic of China

5 Department of Mechanical Engineering, The Hong Kong Polytechnic University, Kowloon, Hong Kong SAR

6 Shenzhen Geim Graphene Center, Shenzhen Key Laboratory for Value-added Applications, Institute of Materials Research, Tsinghua Shenzhen International Graduate School, Tsinghua University, Shenzhen, P.R. China

7 Department of Chemistry, National University of Singapore, Singapore, Singapore

8 Department of Nuclear Science and Engineering and Department of Materials Science and Engineering, Massachusetts Institute of Technology, Cambridge, MA, USA.

9 Shenzhen Research Institute, City University of Hong Kong, Shenzhen, People’s Republic of China

* Corresponding authors: Ju Li (liju@mit.edu) and Zhiyuan Zeng (zhiyzeng@cityu.edu.hk)

**Contents**

1. **Supplementary Figures 1-40**

Supplementary Fig. 1. | The atomic models of different phases of MoS2.

Supplementary Fig. 2. | Characterizations of MoS2 bulk powder.

Supplementary Fig. 3. | Characterizations of WS2 bulk powder.

Supplementary Fig. 4. | Characterizations of MoSe2 bulk powder.

Supplementary Fig. 5. | XRD spectra of bulk MoS2, bulk WS2 and bulk MoSe2.

Supplementary Fig. 6. | XPS spectra of bulk MoS2, bulk WS2 and bulk MoSe2.

Supplementary Fig. 7. | Photograph of exfoliated MoS2 NSs dispersed in water.

Supplementary Fig. 8. | Phase analysis of exfoliated MoS2 NSs by traditional electrochemical Li-ion intercalation.

Supplementary Fig. 9. | XAFS results of 1T’- and 2H-MoS2 NSs.

Supplementary Fig. 10. | The structural model of 1T’- and 2H-MoS2 NSs.

Supplementary Fig. 11. | TEM analysis of 1T’- and 2H-MoS2 NSs.

Supplementary Fig. 12. | Electrochemical discharge profiles of WS2.

Supplementary Fig. 13. | XPS spectra of exfoliated WS2 NSs by traditional electrochemical Li-ion intercalation.

Supplementary Fig. 14. | Electrochemical discharge profiles of MoSe2.

Supplementary Fig. 15. | XPS spectra of exfoliated MoSe2 NSs by traditional electrochemical Li-ion intercalation.

Supplementary Fig. 16. | AFM measurement of 1T’-WS2 NSs.

Supplementary Fig. 17. | AFM measurement of 1T’-MoSe2 NSs.

Supplementary Fig. 18. | AFM images of exfoliated 2H-WS2 NSs.

Supplementary Fig. 19. | AFM images of exfoliated 2H-MoS2 NSs.

Supplementary Fig. 20. | TEM analysis of 1T’- and 2H-WS2 NSs.

Supplementary Fig. 21. | TEM analysis of 1T’- and 2H-MoSe2 NSs.

Supplementary Fig. 22. | XPS spectra corresponding to 1T’ phase and MoO*x* ratios of MoS2 by regulation of cut-off voltage and temperature.

Supplementary Fig. 23. | The discharge curves for the Li-ion intercalation capacity.

Supplementary Fig. 24. | Structural diagram of *In-situ* XRD.

Supplementary Fig. 25. | *In-situ* Raman patterns of electrochemical lithiation of MoS2 in PC-based electrolyte.

Supplementary Fig. 26. | The binding and desolvation energies of DEGDME, DEC, PC, and EC with Li+ in different coordination numbers.

Supplementary Fig. 27. | The MSD of Li+ in DEGDME, DEC, PC, and EC electrolytes.

Supplementary Fig. 28. | The interaction energies between Li+ and MoS2 as well as the distortion ratios of MoS2 in different electrolytes.

Supplementary Fig. 29. | 2H-MoS2||LiFePO4 pouch-type battery before charging.

Supplementary Fig. 30. | Charge profiles of battery in DEGDME-based and PC-based electrolytes.

Supplementary Fig. 31. | Characterizations of the as-fabricated 2D 1T’-MoS2 NSs and their aqueous suspensions.

Supplementary Fig. 32. | Schematic representation of monolayer MoS2 nanosheets with different particle sizes obtained using differential centrifugation.

Supplementary Fig. 33. | AFM images of exfoliated 1T’-MoS₂ NSs with measured thicknesses in different sizes.

Supplementary Fig. 34. | Standard curves of NH4+-N quantification by the colorimetric method.

Supplementary Fig. 35. | Chronoamperometric curves of TMDs nanosheets in at different potentials.

Supplementary Fig. 36. | The PDOS of 1T’-WS2, 1T’-MoS2, and 1T’-MoSe2.

Supplementary Fig. 37. | The d-band center and p-band center evolutions for 1T’-WS2, 1T’-MoS2 and 1T’-MoSe2.

Supplementary Fig. 38. | The PDOS comparisons between 1T’ and 2H phases of MoS2 and WS2.

Supplementary Fig. 39. | The energy evolutions for nitrate reduction in 1T’-WS2 and 2H-WS2.

**2. Supplementary Tables 1-2**

Supplementary Table S1. | Comparison of other exfoliation methods with phase-selective exfoliation for producing high-phase purity TMDs nanosheets.

Supplementary Table S2. | Detailed information for previously published NO3− reduction reaction catalyst.

**3. Supplementary References**


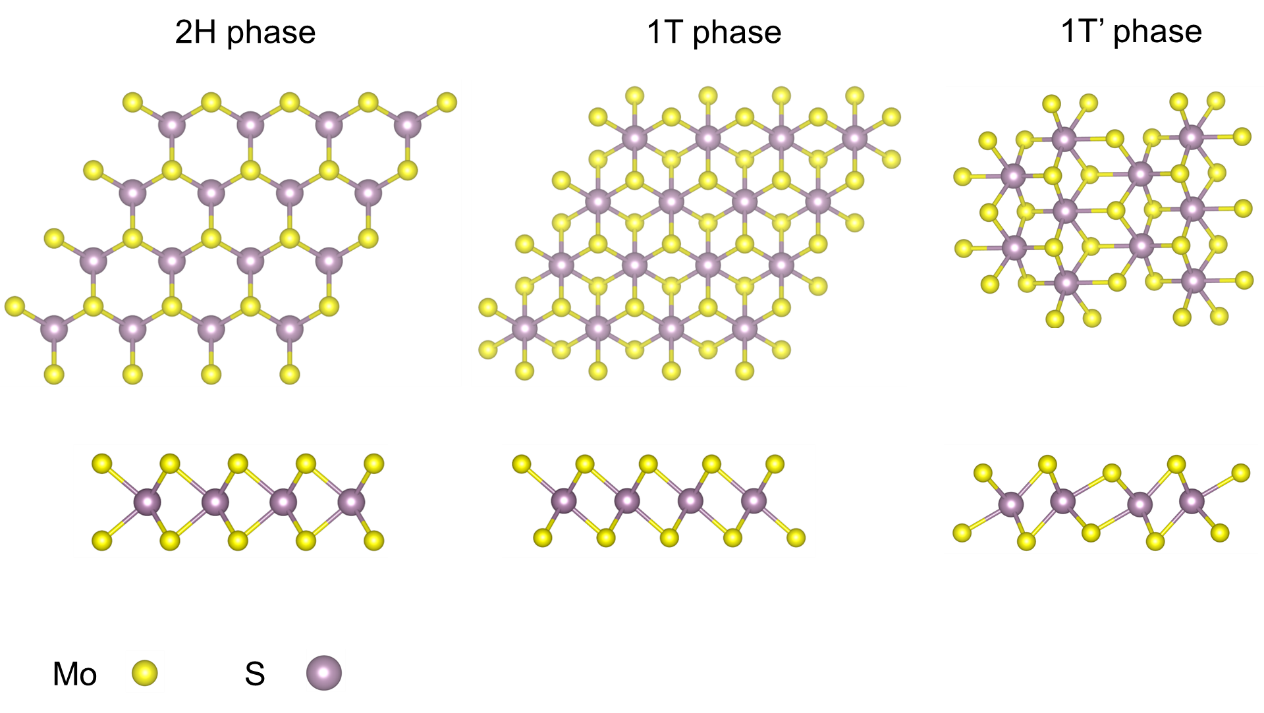


**Supplementary Fig. 1****. | The atomic models of different phases of MoS2**. Schematic illustration of 2H, 1T and 1T’ phase MoS2 structure. Upside: top view of the structure; downside: side view of the structures.


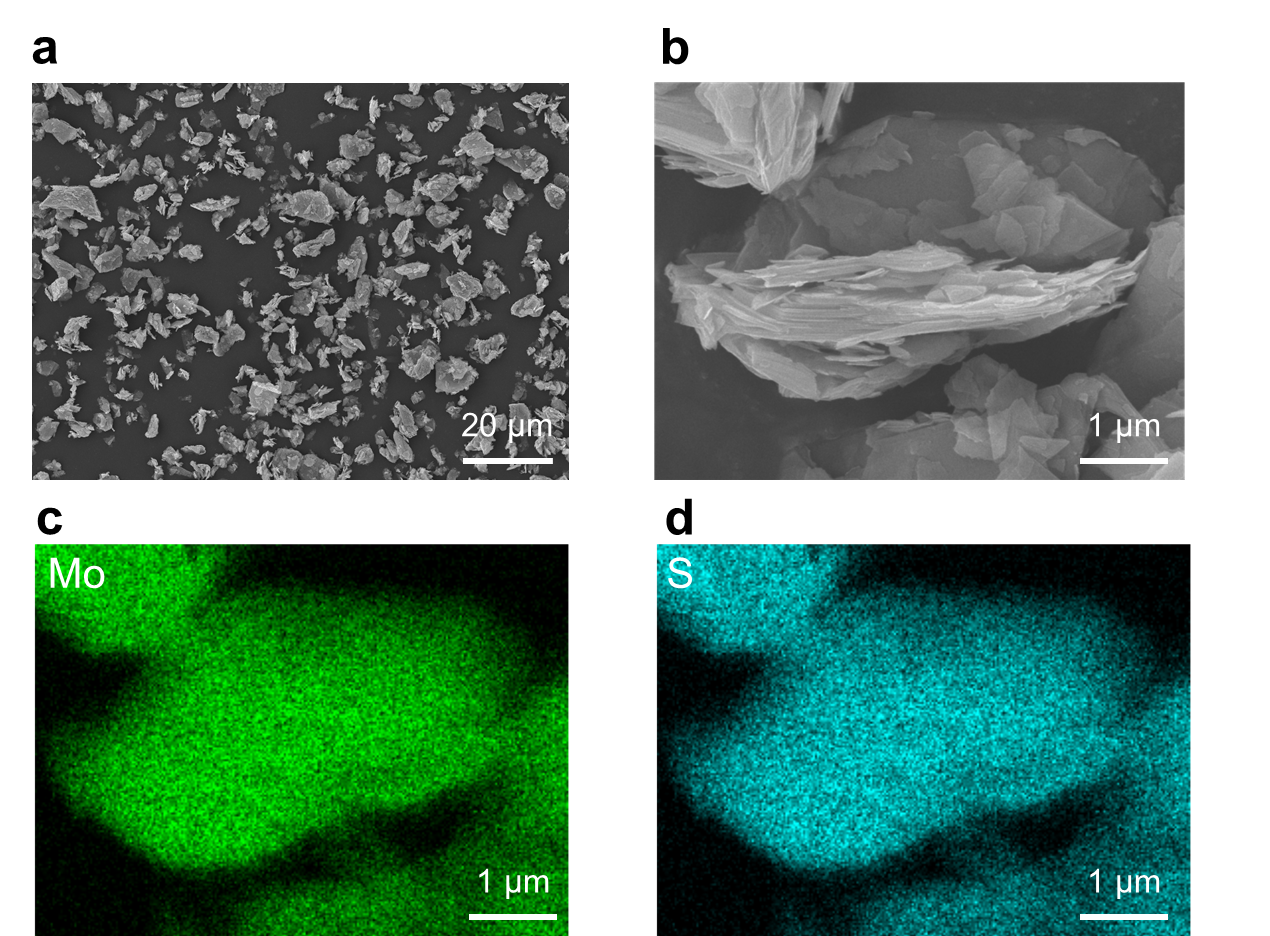


**Supplementary Fig. 2. |** **Characterizations of MoS2 bulk powder.** (**a**) SEM images of MoS2 powder on a large scale. (**b**) SEM images of selected MoS2 particles. **c**,**d** EDS elemental mappings of Mo (**c**) and S (**d**) corresponding to (**b**).


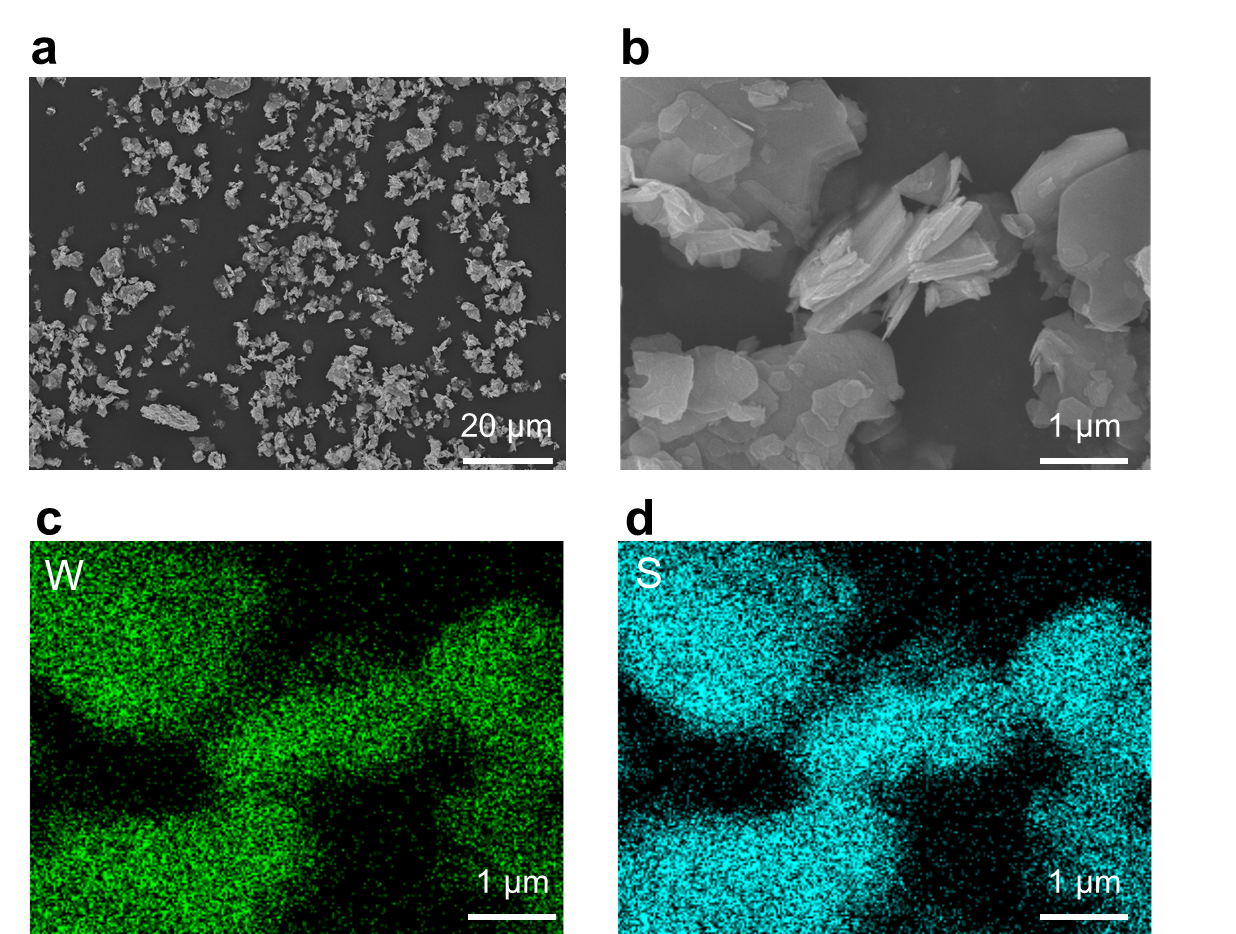


**Supplementary Fig. 3. |** **Characterizations of WS2 bulk powder.** (**a**) SEM images of WS2 powder on a large scale. (**b**) SEM images of selected WS2 particles. **c**,**d** EDS elemental mappings of W (**c**) and S (**d**) corresponding to (**b**).


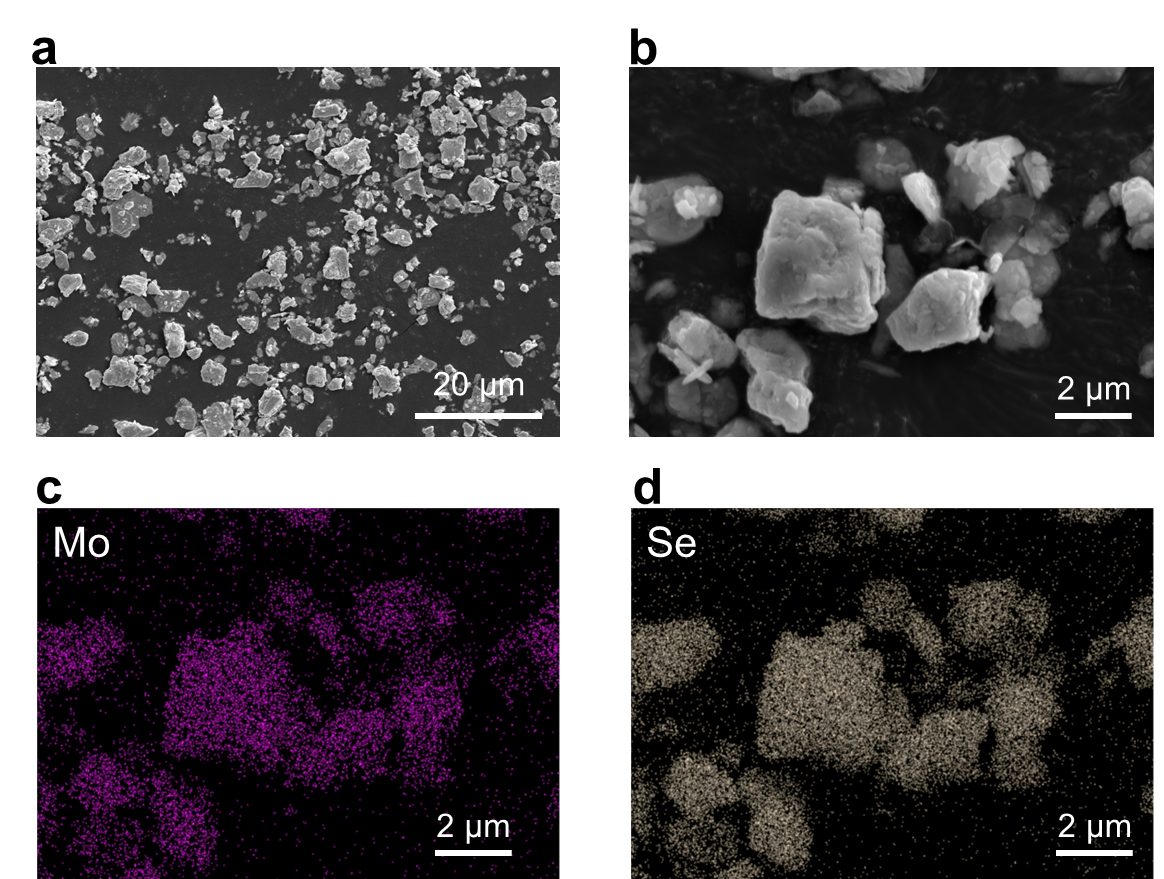


**Supplementary Fig. 4. |** **Characterizations of MoSe2 bulk powder.** (**a**) SEM images of MoSe2 powder on a large scale. (**b**) SEM images of selected MoSe2 particles. **c**,**d** EDS elemental mappings of Mo (**c**) and Se (**d**) corresponding to (**b**).


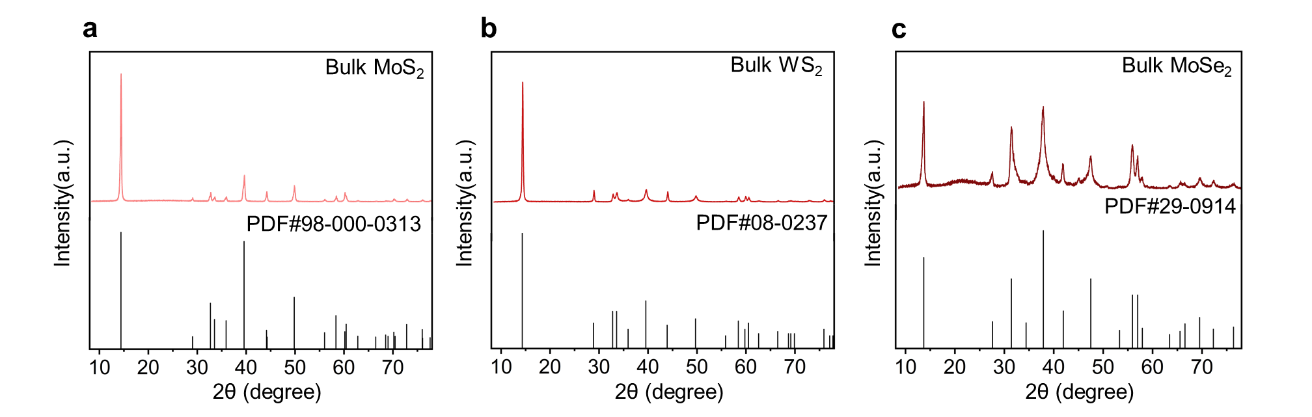


**Supplementary Fig. 5. |** XRD spectra of (**a**) bulk MoS2, (**b**) bulk WS2 and (**c**) bulk MoSe2. XRD results show the high purity of bulk TMDs source, no peaks for impurities are detected.

**
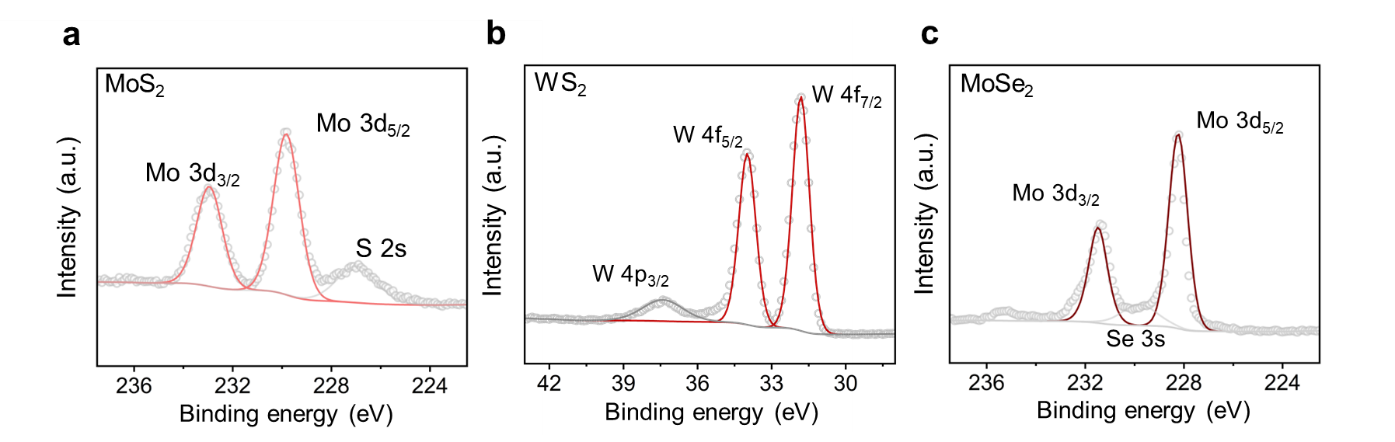
**

**Supplementary Fig. 6. |** XPS spectra of (**a**) bulk MoS2, (**b**) bulk WS2 and (**c**) bulk MoSe2. XPS results show the bulk TMDs source are all pure 2H phase.


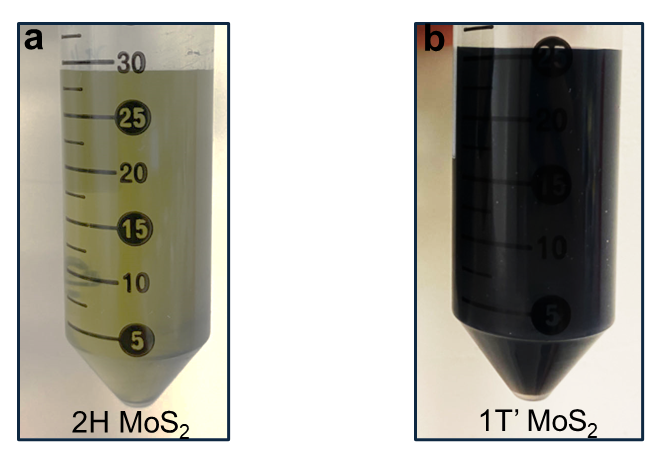


**Supplementary Fig. 7. |** **Photograph of exfoliated MoS2 NSs dispersed in water**. (**a**) 2H-MoS2. (**b**) 1T’-MoS2. After 5 minutes of sonication, MoS2 was completely dispersed in the DI water, presenting two suspensions that would appear dark green and dark black, respectively.


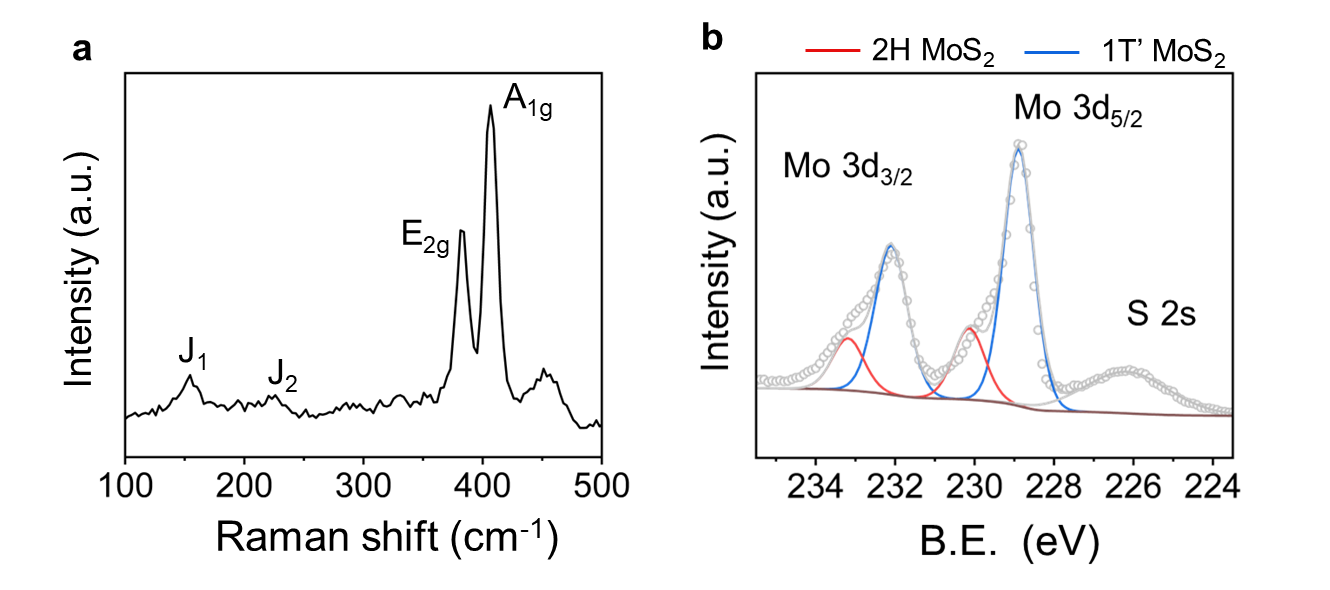


**Supplementary Fig. 8.** **| Phase analysis of exfoliated MoS2 NSs by traditional electrochemical Li-ion intercalation**. (**a**) Raman spectra of the exfoliated MoS2. (**b**) XPS spectra of the exfoliated MoS2. (a.u., arbitrary unit).

**
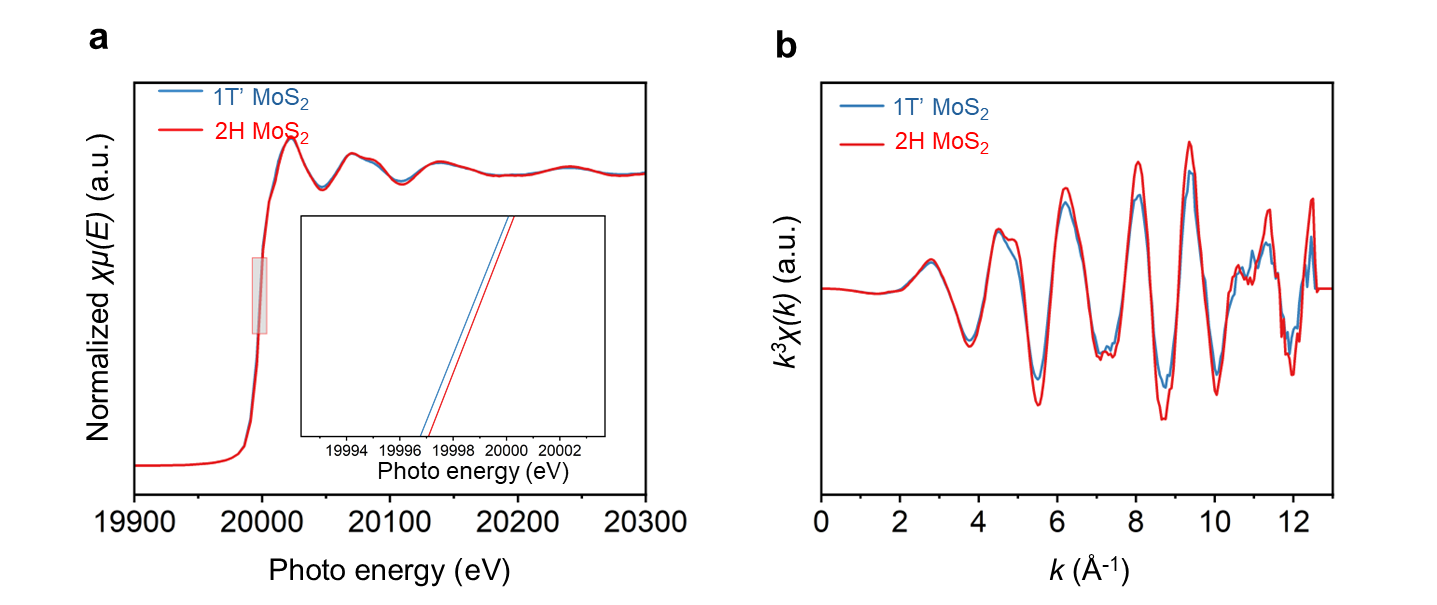
**

**Supplementary Fig. 9.** **| XAFS results of 1T’- and 2H-MoS2 NSs.** (**a**) Normalized XAFS spectra of 1T’- and 2H-MoS2 NSs. (**b**) The EXAFS oscillation curves of the Mo K-edge of 1T’-MoS2 and 2H-MoS2. The Mo K-edge absorption spectra were recorded at room temperature in the transmission mode. The 1T’-MoS2 and 2H-MoS2 NSs aqueous solution (5 wt.% MoS2 in DI water) were used for the XAFS measurements. The chemical state of Mo in 1T’-MoS2 was a little lower than that of 2H-MoS2 according to the Mo K-edge XAFS spectra (Supplementary Fig. 9a), because the surface of 1T’-MoS2 is rich in electron1.


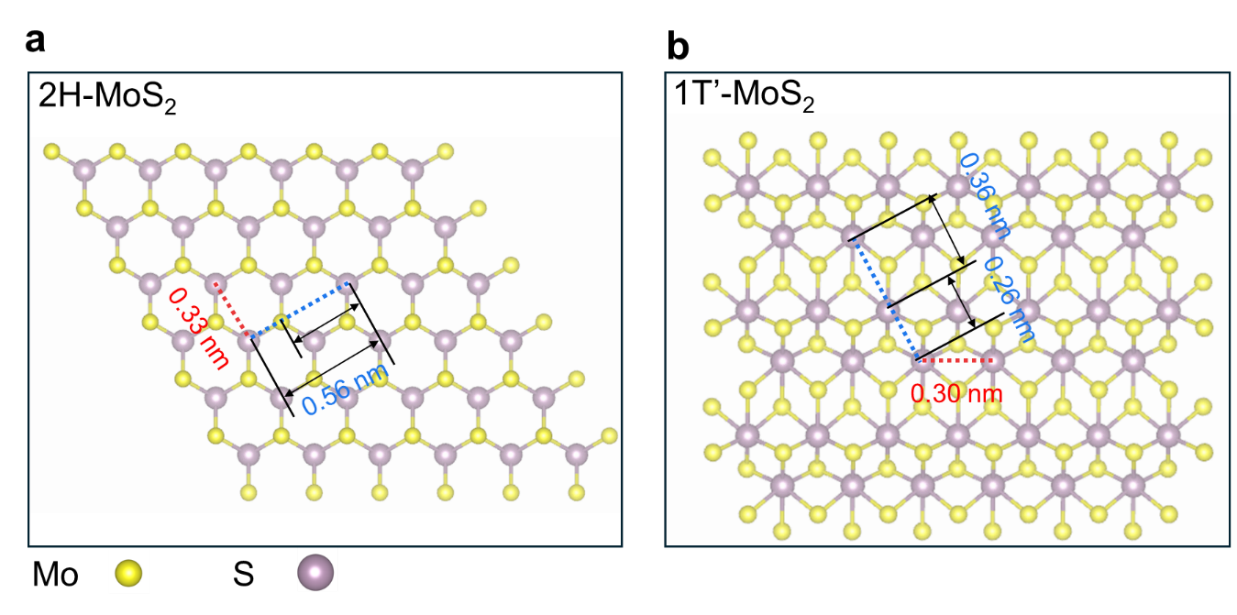


**Supplementary Fig. 10.** **| The structural model of 1T’- and 2H-MoS2 NSs.** Schematic illustrations of the atomic structures of (**a**) 2H-MoS2 and (**b**) 1T’-MoS2, respectively.


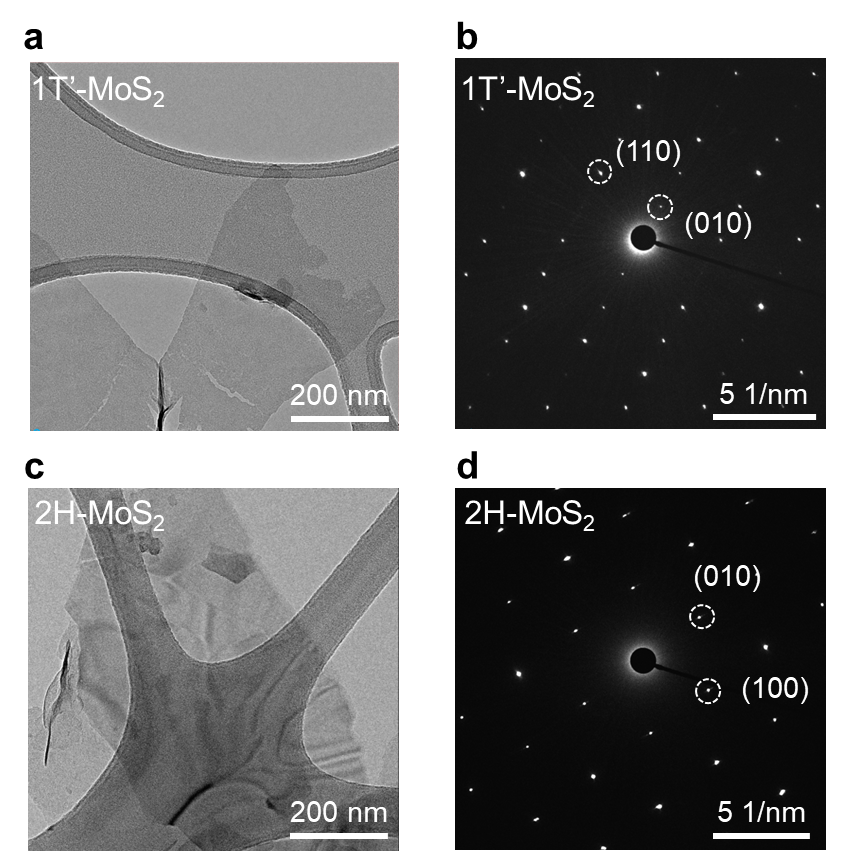


**Supplementary Fig. 11. | TEM analysis of 1T’- and 2H-MoS2 NSs**. TEM images of 1T’-MoS2 NSs (**a**) and 2H-MoS2 NSs (**c**). The corresponding selected area electron diffraction (SAED) pattern obtained from the 1T’-MoS2 NSs (**b**) and 2H-MoS2 NSs (**d**).

**
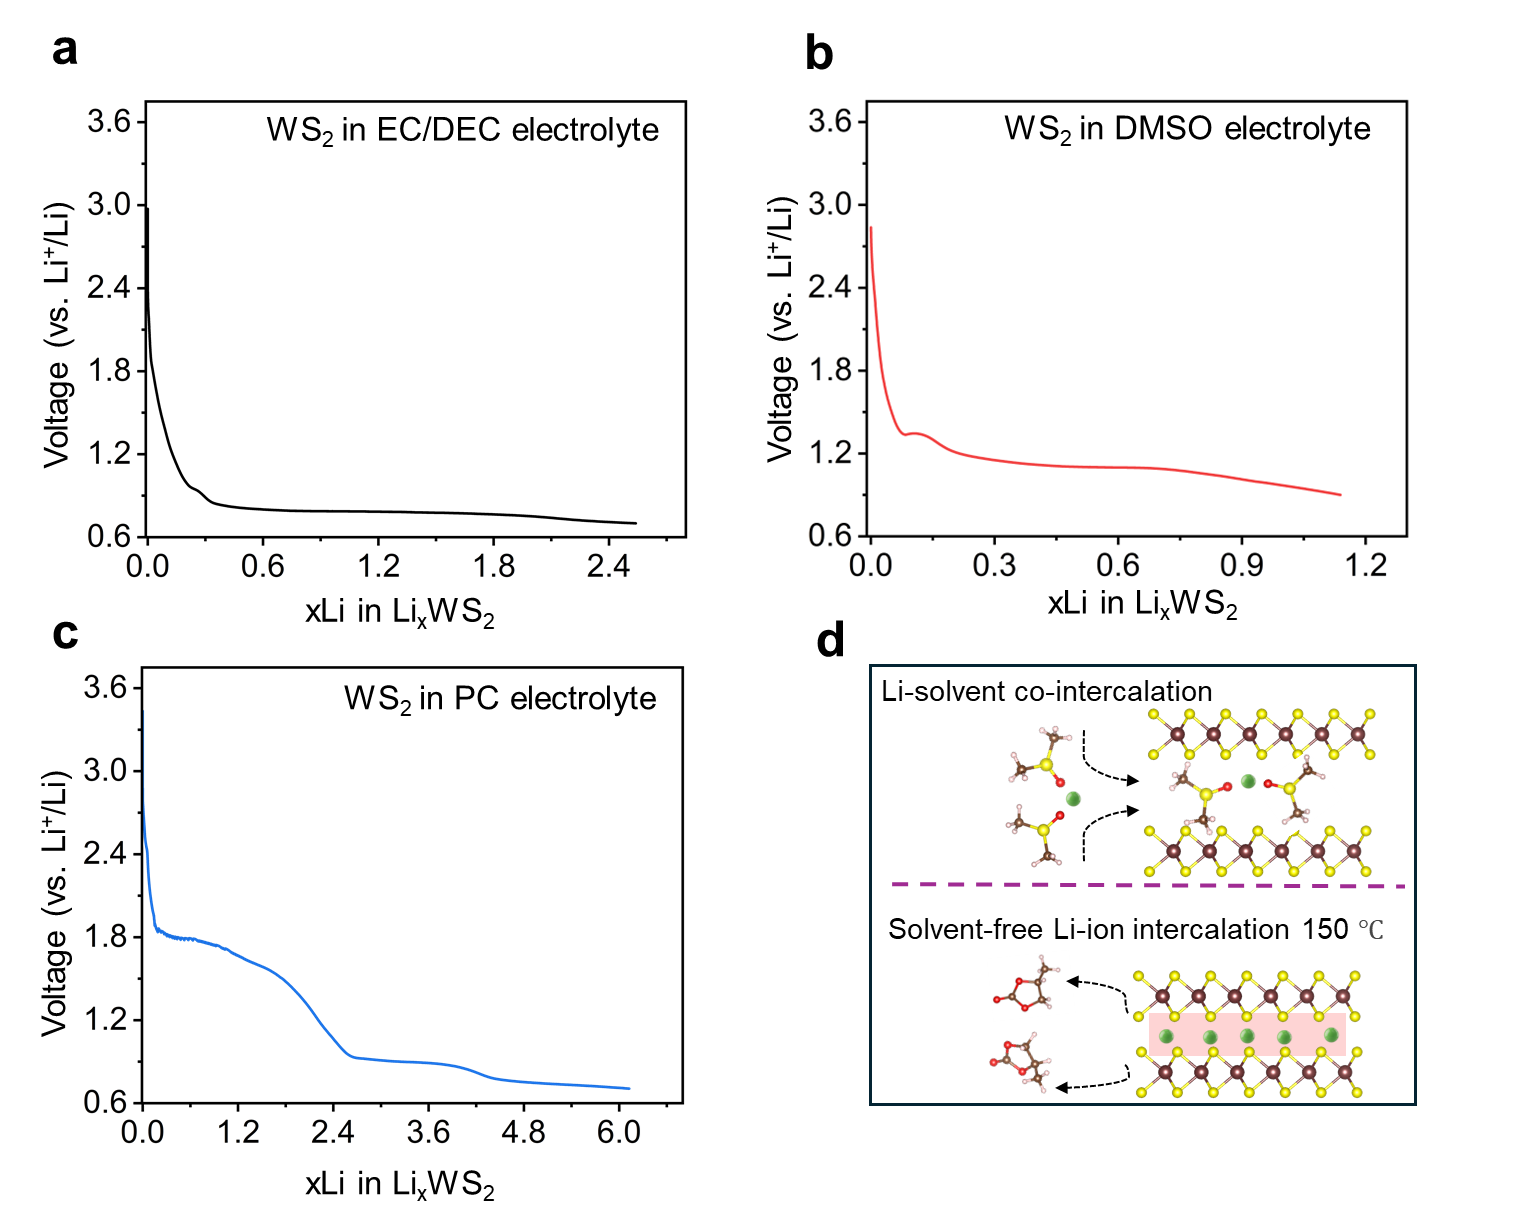
**

**Supplementary Fig. 12. |** Electrochemical discharge voltage profiles of WS2 with traditional electrolyte (cut-off at 0.7 V) (**a**), DMSO-electrolyte (as a co-intercalation electrolyte for 2H-WS2 NSs, cut-off at 1.1 V) (**b**) and PC-electrolyte (as a solvent-free intercalation electrolyte for 1T’-WS2 NSs, cut-off at 0.7 V, 150 °C) (**c**). (**d**) Schematics for the phase-selective synthesis for WS2.


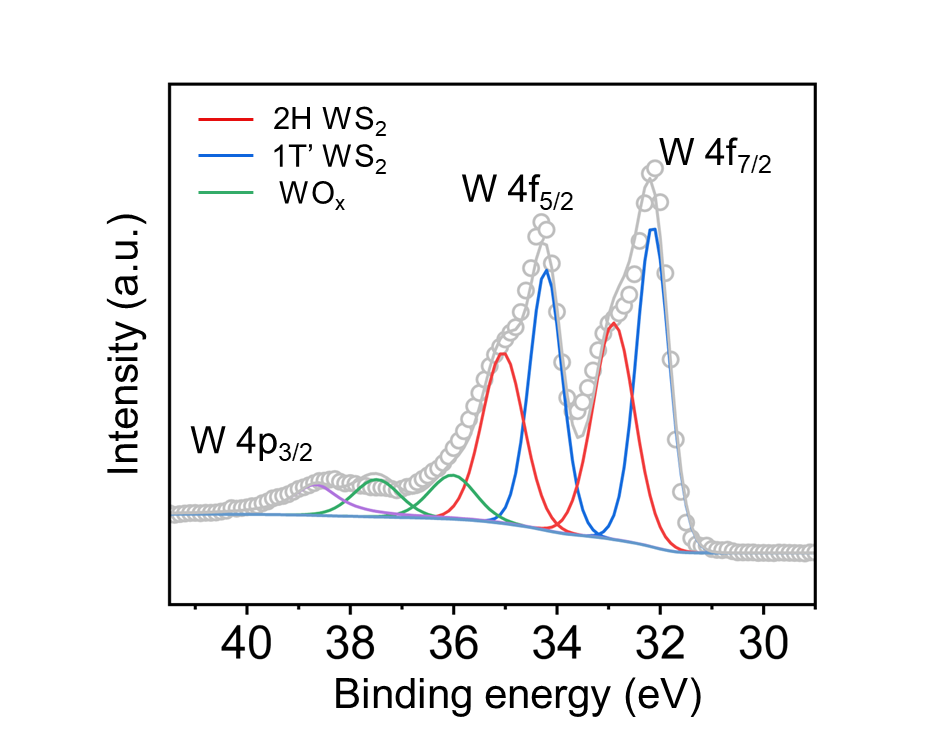


**Supplementary Fig. 13.** **| XPS spectra of exfoliated WS2 NSs by traditional electrochemical Li-ion intercalation.** The mixed phase of 2H and 1T’ WS2 is consistent with previously reported results2.


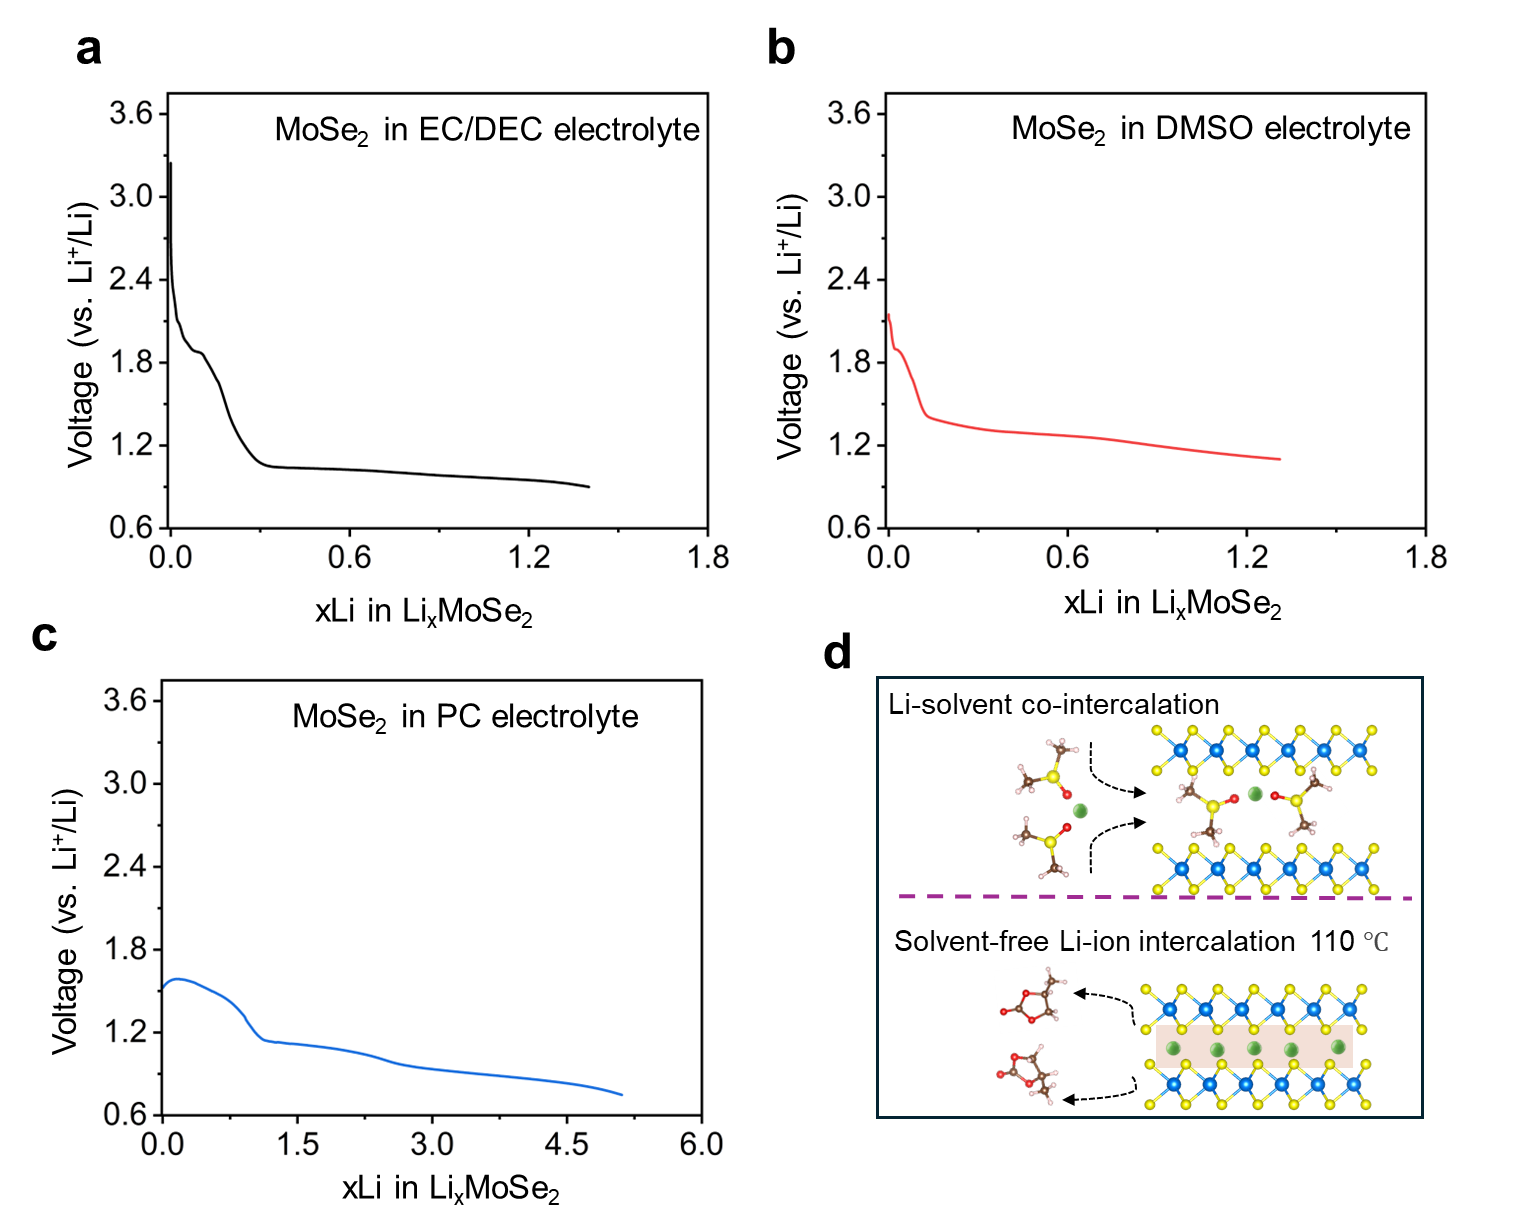


**Supplementary Fig. 14. |** Electrochemical discharge voltage profiles of MoSe2 with traditional electrolyte (cut-off at 0.7 V) (**a**), DMSO-electrolyte (as a co-intercalation electrolyte for 2H-MoSe2 NSs, cut-off at 1.1 V) (**b**) and PC-electrolyte (as a solvent-free intercalation electrolyte for 1T’-MoSe2 NSs, cut-off at 0.7 V, 110 °C) (**c**). (**d**) Schematics for the phase-selective synthesis for WS2.


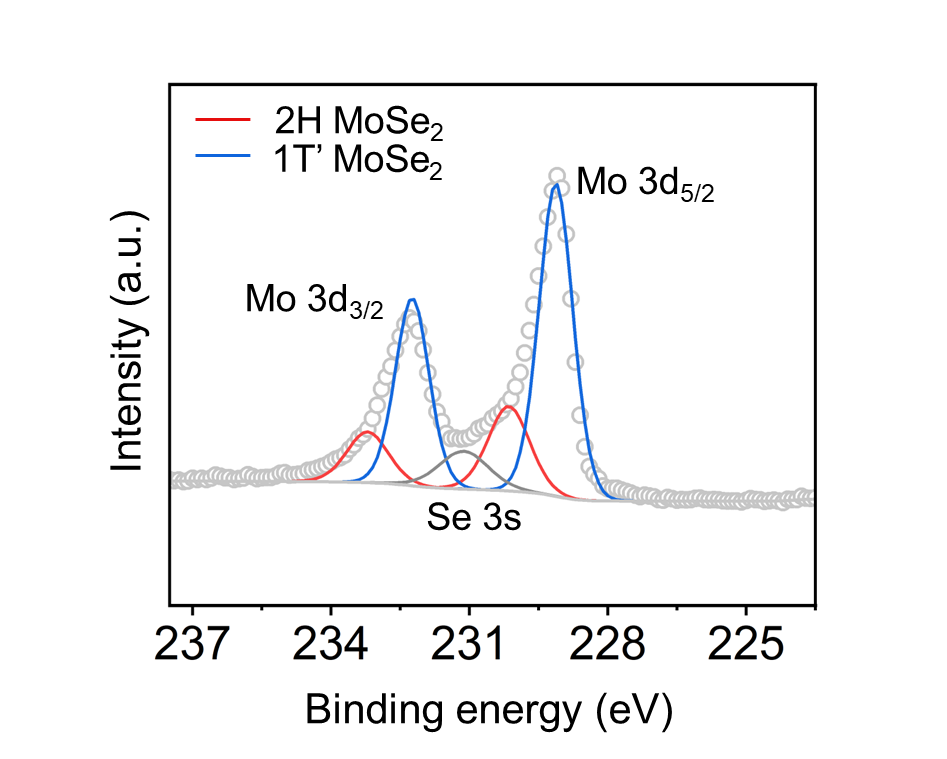


**Supplementary Fig. 15.** **| XPS spectra of exfoliated MoSe2 NSs by traditional electrochemical Li-ion intercalation.** The mixed phase of 2H and 1T’ MoSe2 is consistent with previously reported results3,4.


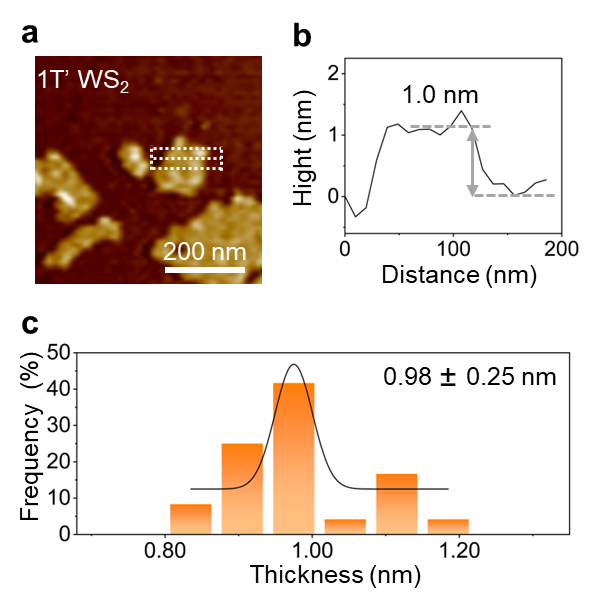


**Supplementary Fig. 16.** **| AFM measurement of 1T’-WS2 NSs.** (**a**) The measured thicknesses (WS2 NSs selected from Extended Data Fig. 1b), (**b**) height profiles of 1T’-WS2 NSs and (**c**) thickness distribution histogram of 1T’-WS2 NSs measured by AFM (0.98 nm is the mean thickness, and 0.25 nm is the s.d.) with a single-layer yield of 91%.


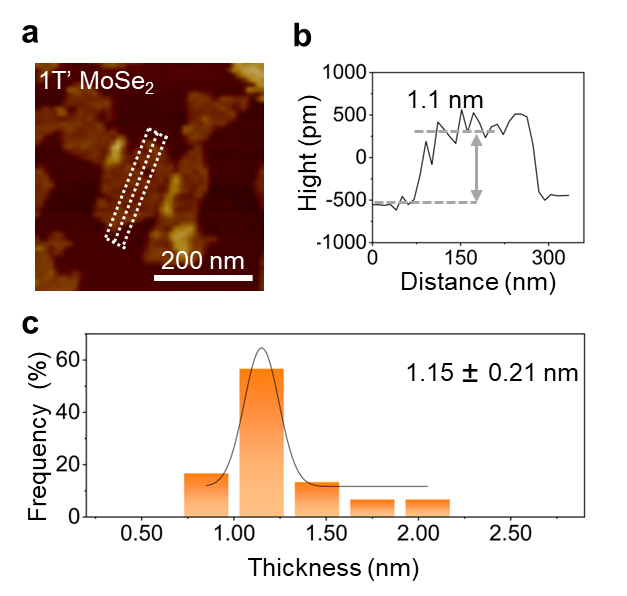


**Supplementary Fig. 17.** **| AFM measurement of 1T’-MoSe2 NSs.** (**a**) The measured thicknesses (MoSe2 NSs selected from Extended Data Fig. 1f), (**b**) height profiles of 1T’-MoSe2 NSs and (**c**) thickness distribution histogram of 1T’-MoS2 NSs measured by AFM with a single-layer yield of 90% (1.15 nm is the mean thickness, and 0.27 nm is the s.d.).


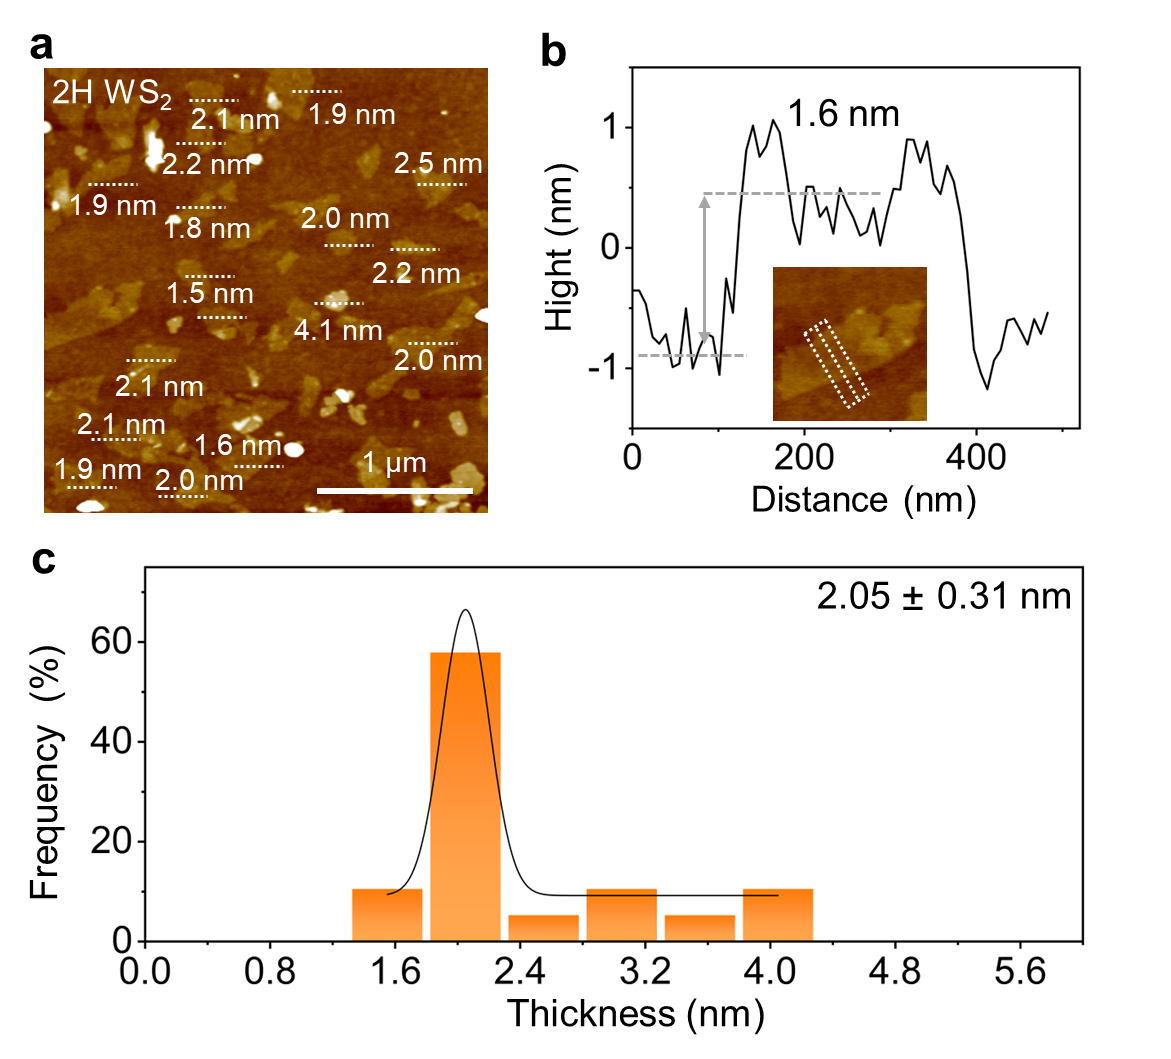


**Supplementary Fig. 18.** **| AFM images of exfoliated 2H-WS2 NSs.** (**a**) The measured thicknesses, (**b**) height profiles of 2H-WS2 NSs and (**c**) thickness distribution histogram of 2H-WS2 NSs measured by AFM with a bi-layer yield of 75% (2.05 nm is the mean thickness, and 0.31 nm is the s.d.).


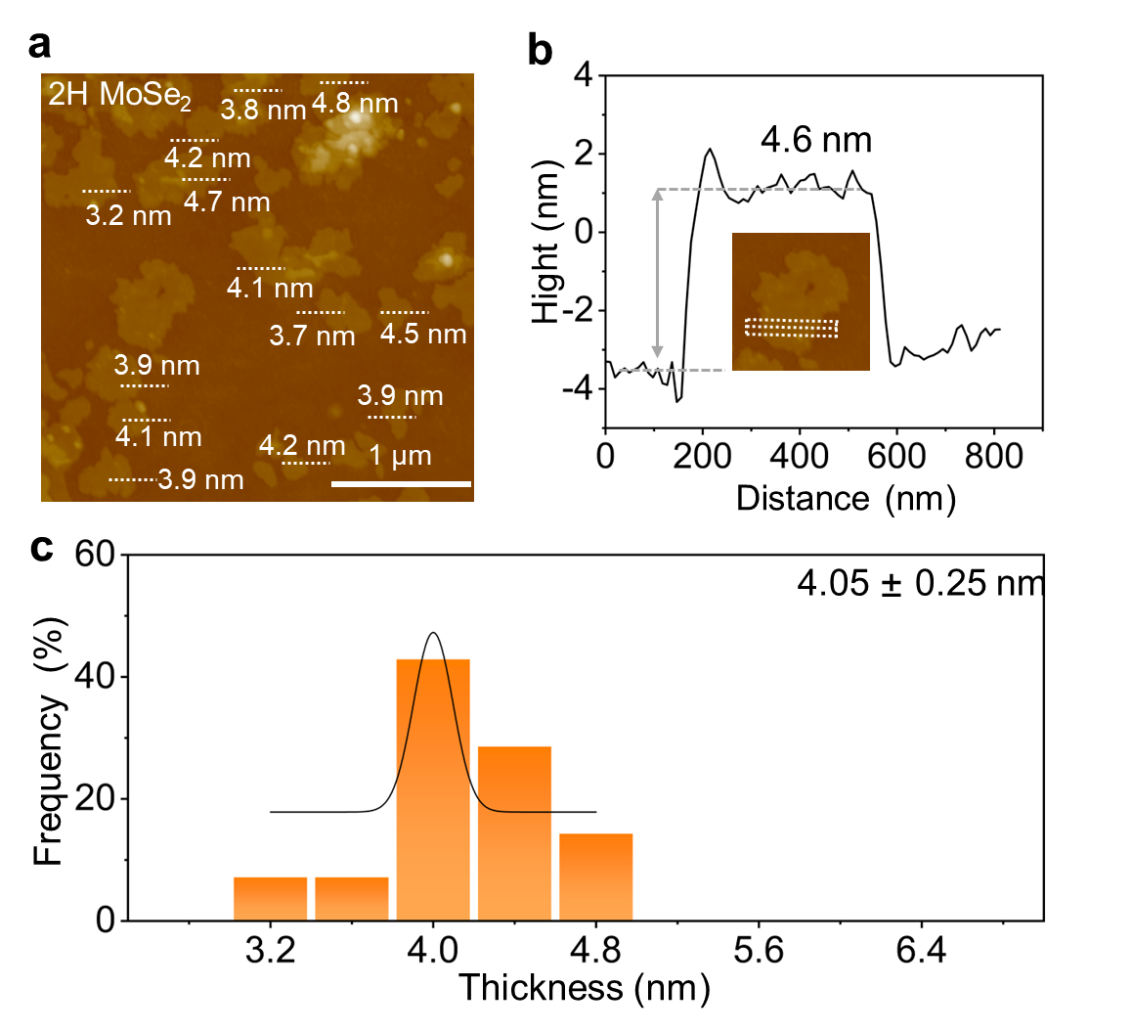


**Supplementary Fig. 19.** **| AFM images of exfoliated 2H-MoSe2 NSs.** (**a**) The measured thicknesses, (**b**) height profiles of 2H-MoSe2 NSs and (**c**) thickness distribution histogram of 2H-MoSe2 NSs measured by AFM with a tri-layer yield of 87% (4.05 nm is the mean thickness, and 0.25 nm is the s.d.).


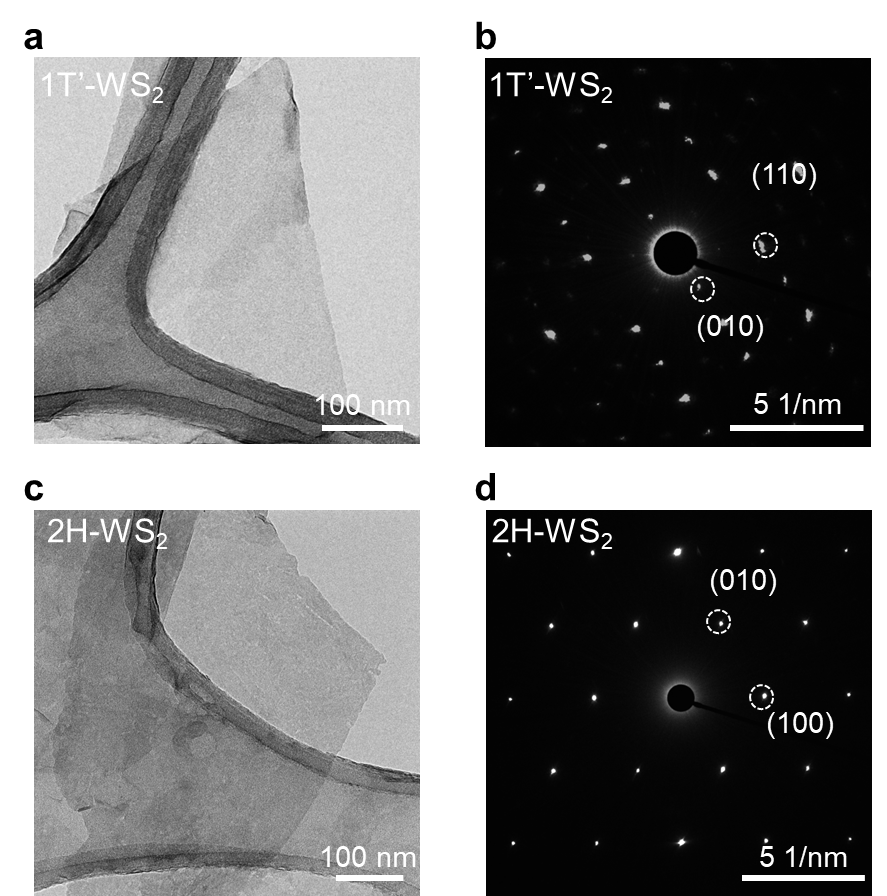


**Supplementary Fig. 20. | TEM analysis of 1T’- and 2H-WS2 NSs**. TEM images of 1T’-WS2 NSs (**a**) and 2H-WS2 NSs (**c**). The corresponding SAED pattern obtained from the 1T’-WS2 NSs (**b**) and 2H-WS2 NSs (**d**).


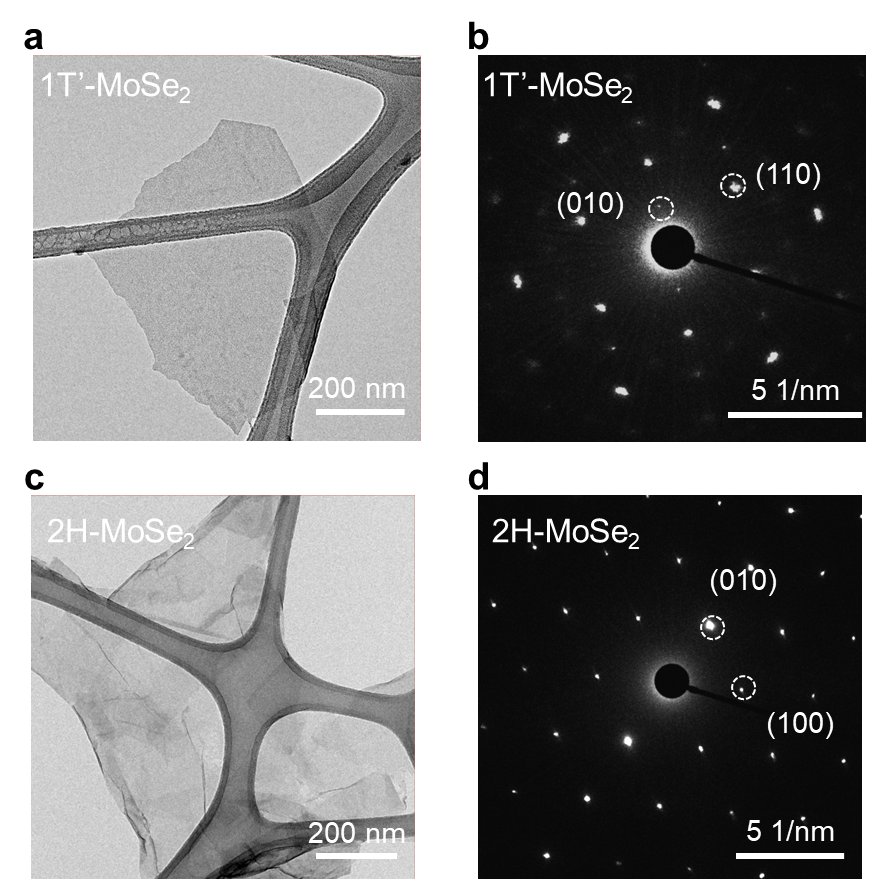


**Supplementary Fig. 21. | TEM analysis of 1T’- and 2H-MoSe2 NSs**. TEM images of 1T’-MoSe2 NSs (**a**) and 2H-MoSe2 NSs (**c**). The corresponding SAED pattern obtained from the 1T’-MoSe2 NSs (**b**) and 2H-MoSe2 NSs (**d**).


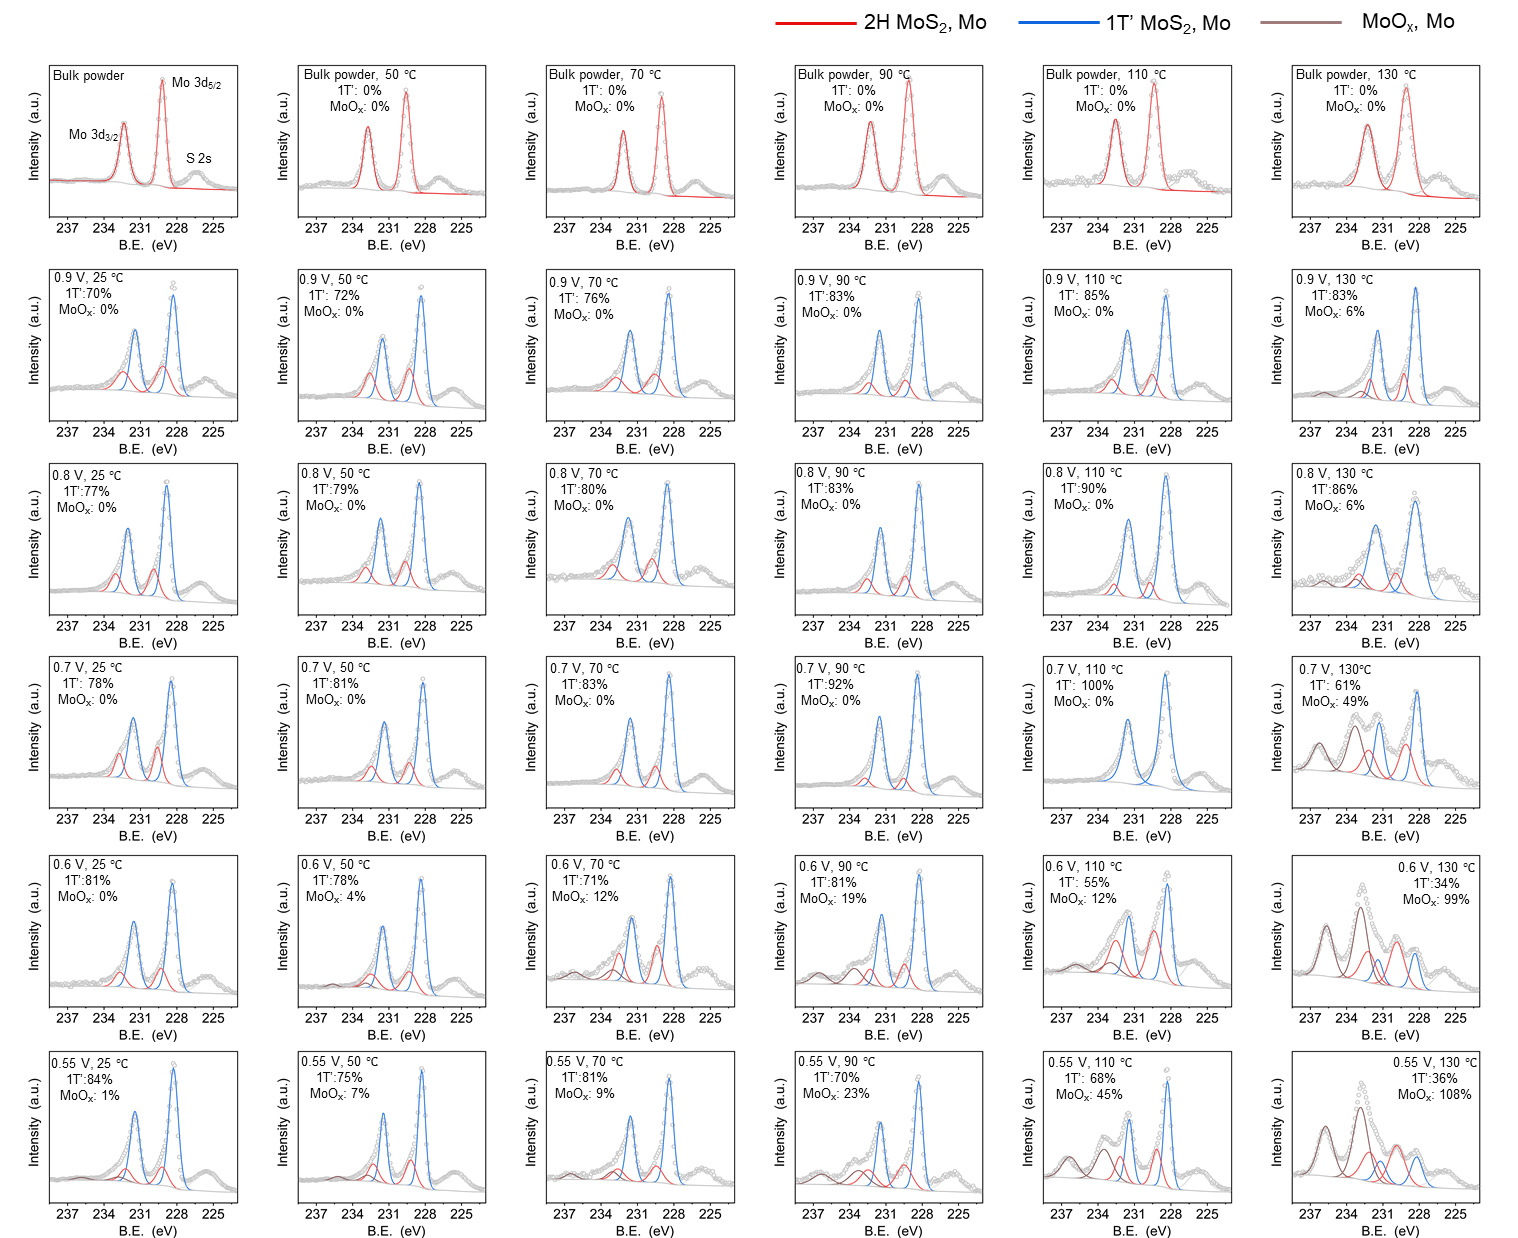


**Supplementary Fig. 22.** **| XPS spectra corresponding to 1T’ phase and MoO*x* ratios of MoS2 by regulation of cut-off voltage and temperature during electrosynthesis.** In our study, we analysed the phase composition of MoS2 using XPS. After performing peak deconvolution, the areas under the peaks corresponding to the 1T’ and 2H phases were determined, allowing us to calculate the total area as the sum of both phases and 1T’ phase relative ratio. To calculate the relative content of MoO*x* in relation to the MoS2, we first determine the area under the peak corresponding to MoO*x* from the XPS spectrum. Next, we calculate the total area of the MoS2 phases by summing the corrected areas of the 1T’ and 2H phases. Finally, the relative content of MoO*x* is found by dividing the area of MoOx by the total area of the MoS2 phases and multiplying by 100 to express it as a percentage. This approach provides the relative content of MoO*x* as a percentage of the total area of the MoS2.


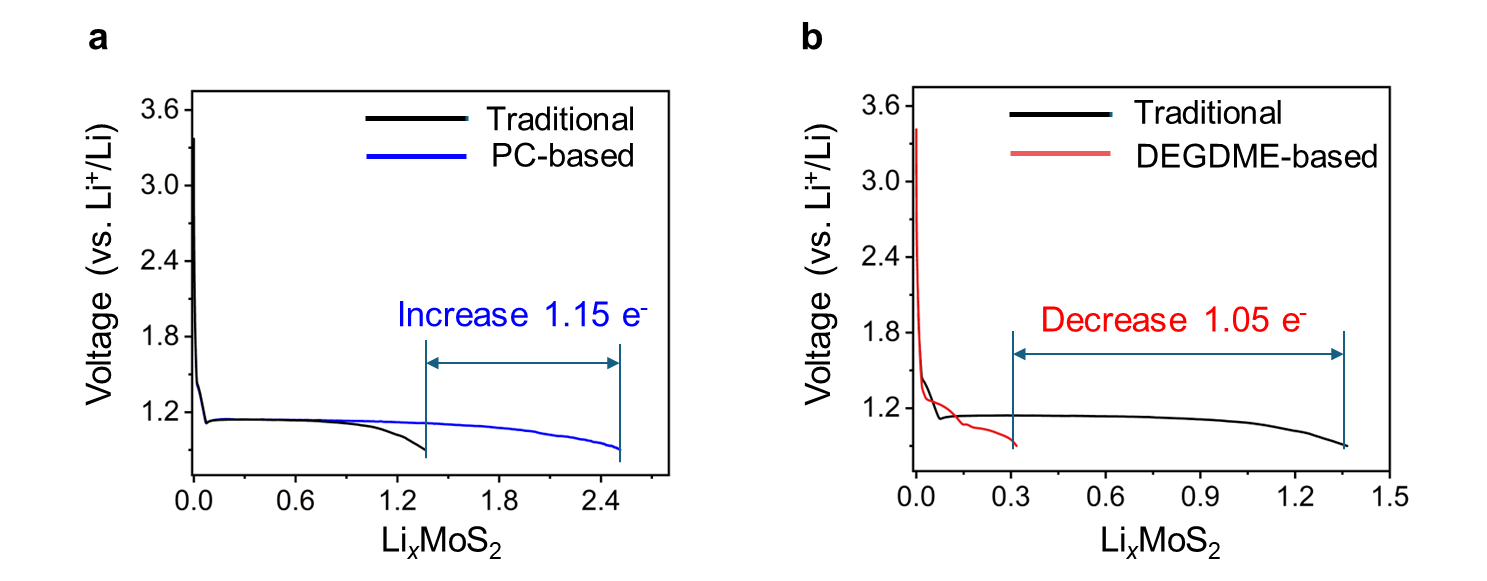


**Supplementary Fig. 23. |** The discharge curves for the Li-ion intercalation capacity in DEGDME-based (**a**) and PC-based electrolytes (**b**) compared to traditional electrolytes (discharged to 0.9 V).


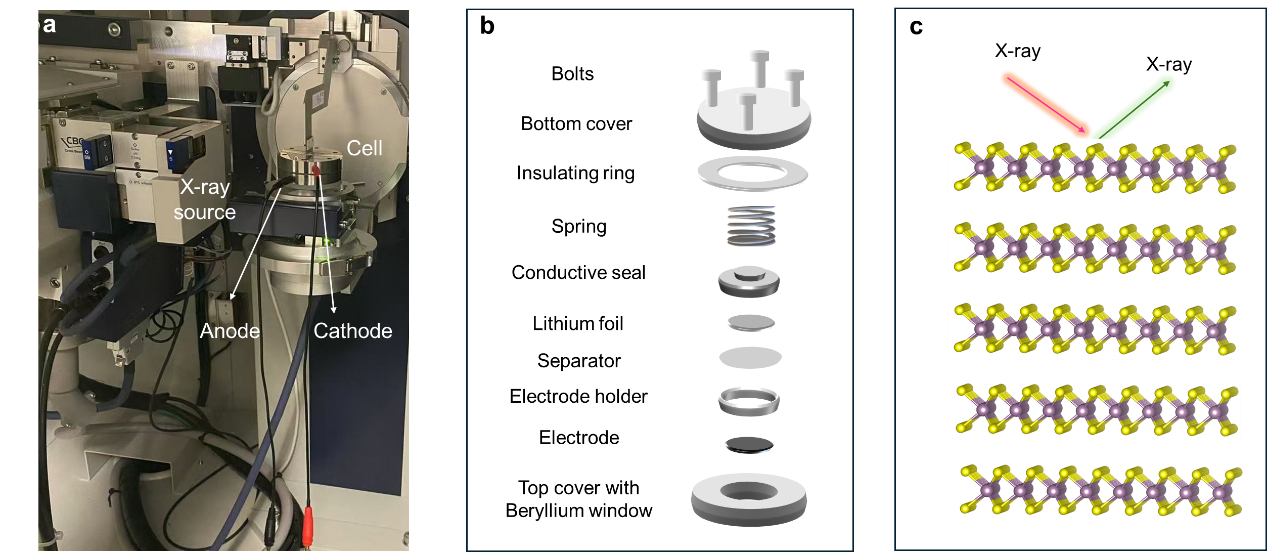


**Supplementary Fig. 24. |** **Structural diagram of *In-situ* XRD**. (**a**) Optical photograph of the test setup for electrochemical *in-situ* XRD. (**b**) Schematic of *In-situ* XRD cell. (**c**) Schematic for diffraction of X-rays in MoS2.


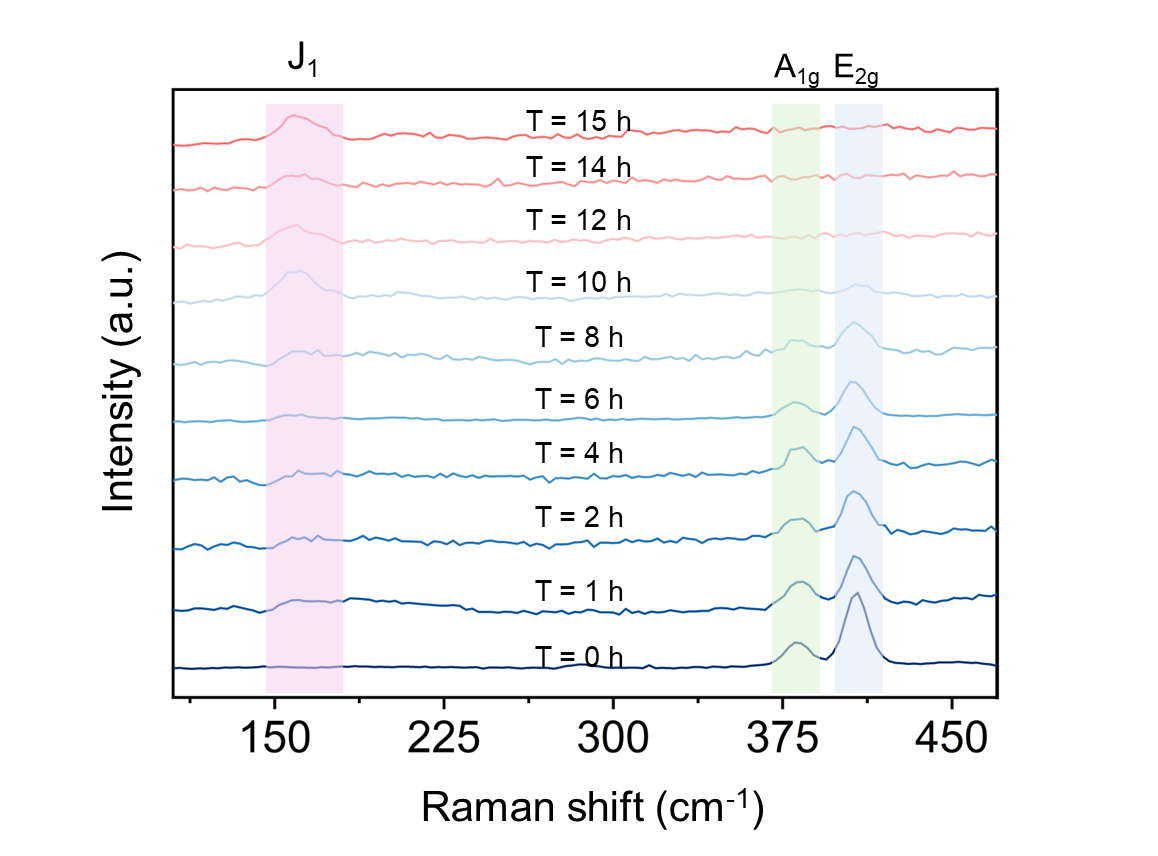


**Supplementary Fig. 25. |** ***In-situ* Raman patterns of electrochemical lithiation of MoS2 in PC-based electrolyte.** Stacked The peaks attributed to 1T(1T’) Li*x*MoS2 (J1) and 2H MoS2 (E2g) are increasing and decreasing with Li-ion intercalation time, implying a 2H to 1T(1T’) transition.


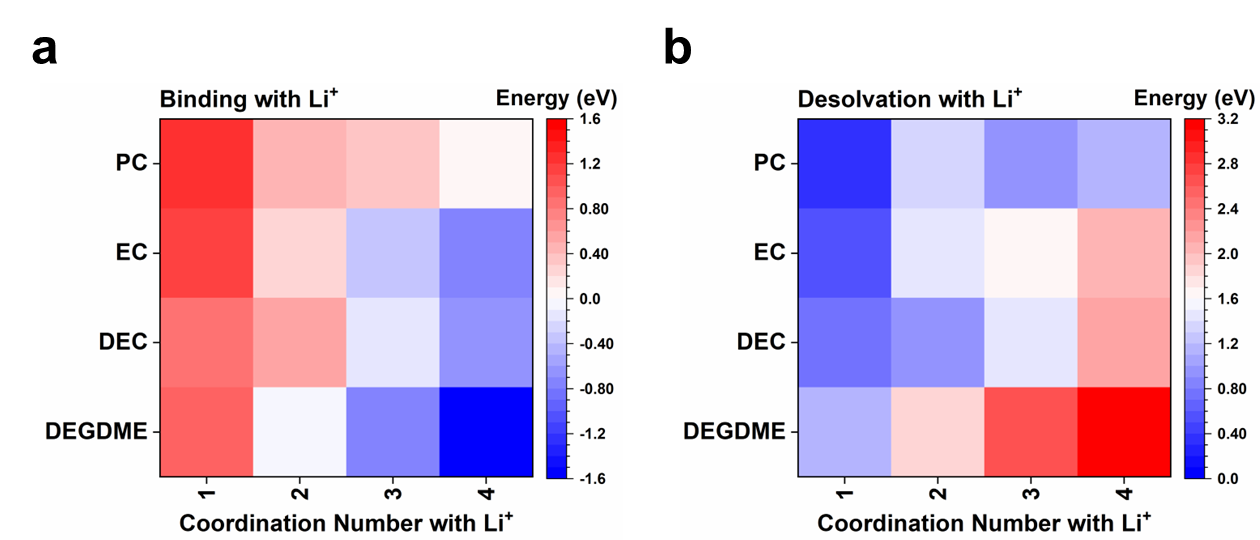


**Supplementary Fig. 26.** | The (**a**) binding and (**b**) desolvation energies of DEGDME, DEC, PC, and EC with Li+ in different coordination numbers.





**Supplementary Fig. 27. |** The MSD of Li+ in DEGDME, DEC, PC, and EC electrolytes.





**Supplementary Fig. 28. |** The interaction energies between Li+ and MoS2 as well as the distortion ratios of MoS2 in different electrolytes.


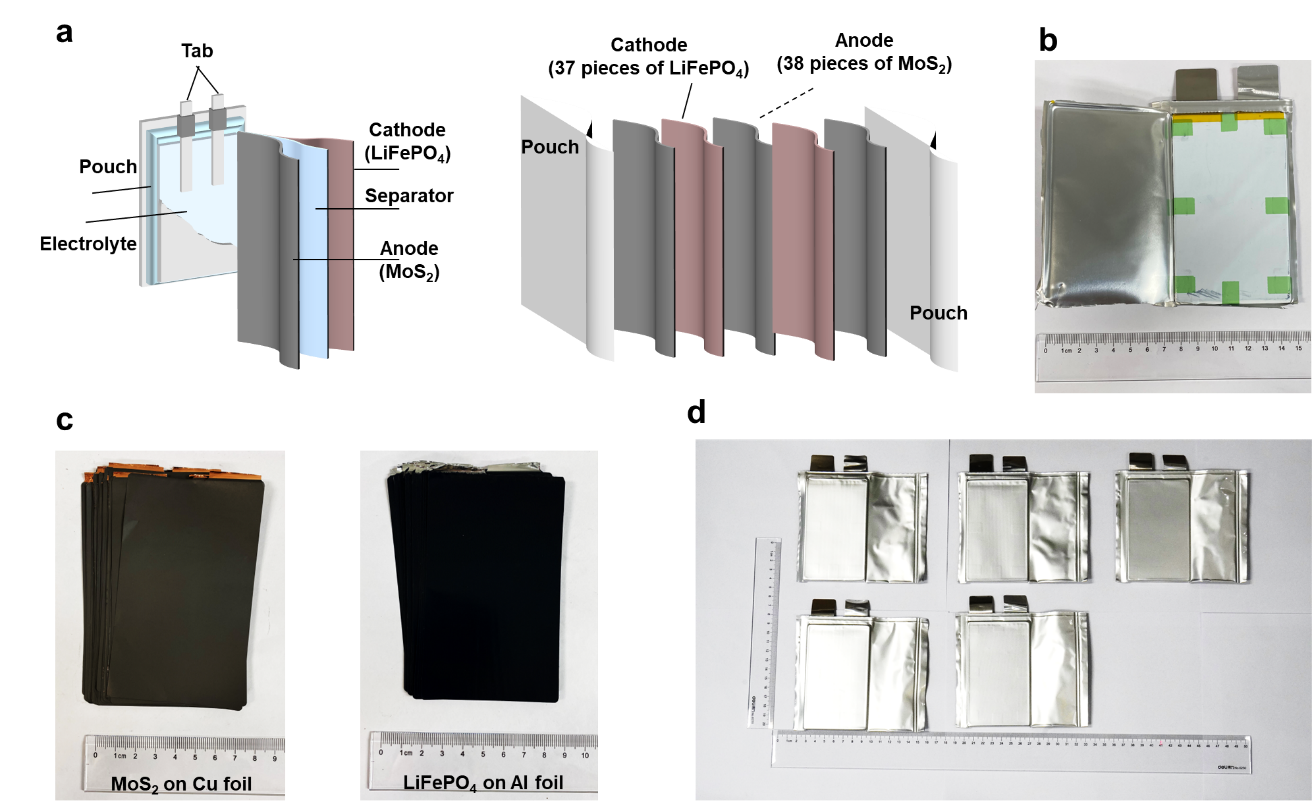


**Supplementary Fig. 29.** **|** **2H-MoS2||LiFePO4 pouch-type battery before charging**. (**a**) Schematic diagram of internal structure of 2H-MoS2||LiFePO4 pouch-type battery. **b**,**c** Photograph of pouch-type battery (**b**) consisting of 38 pieces of MoS2 anodes (left) and 37 pieces of LiFePO4 cathode sheets (right) (**c**). (**d**) Photograph of five pouch-type batteries for scale-up preparation of high-phase-purity MoS2 NSs.


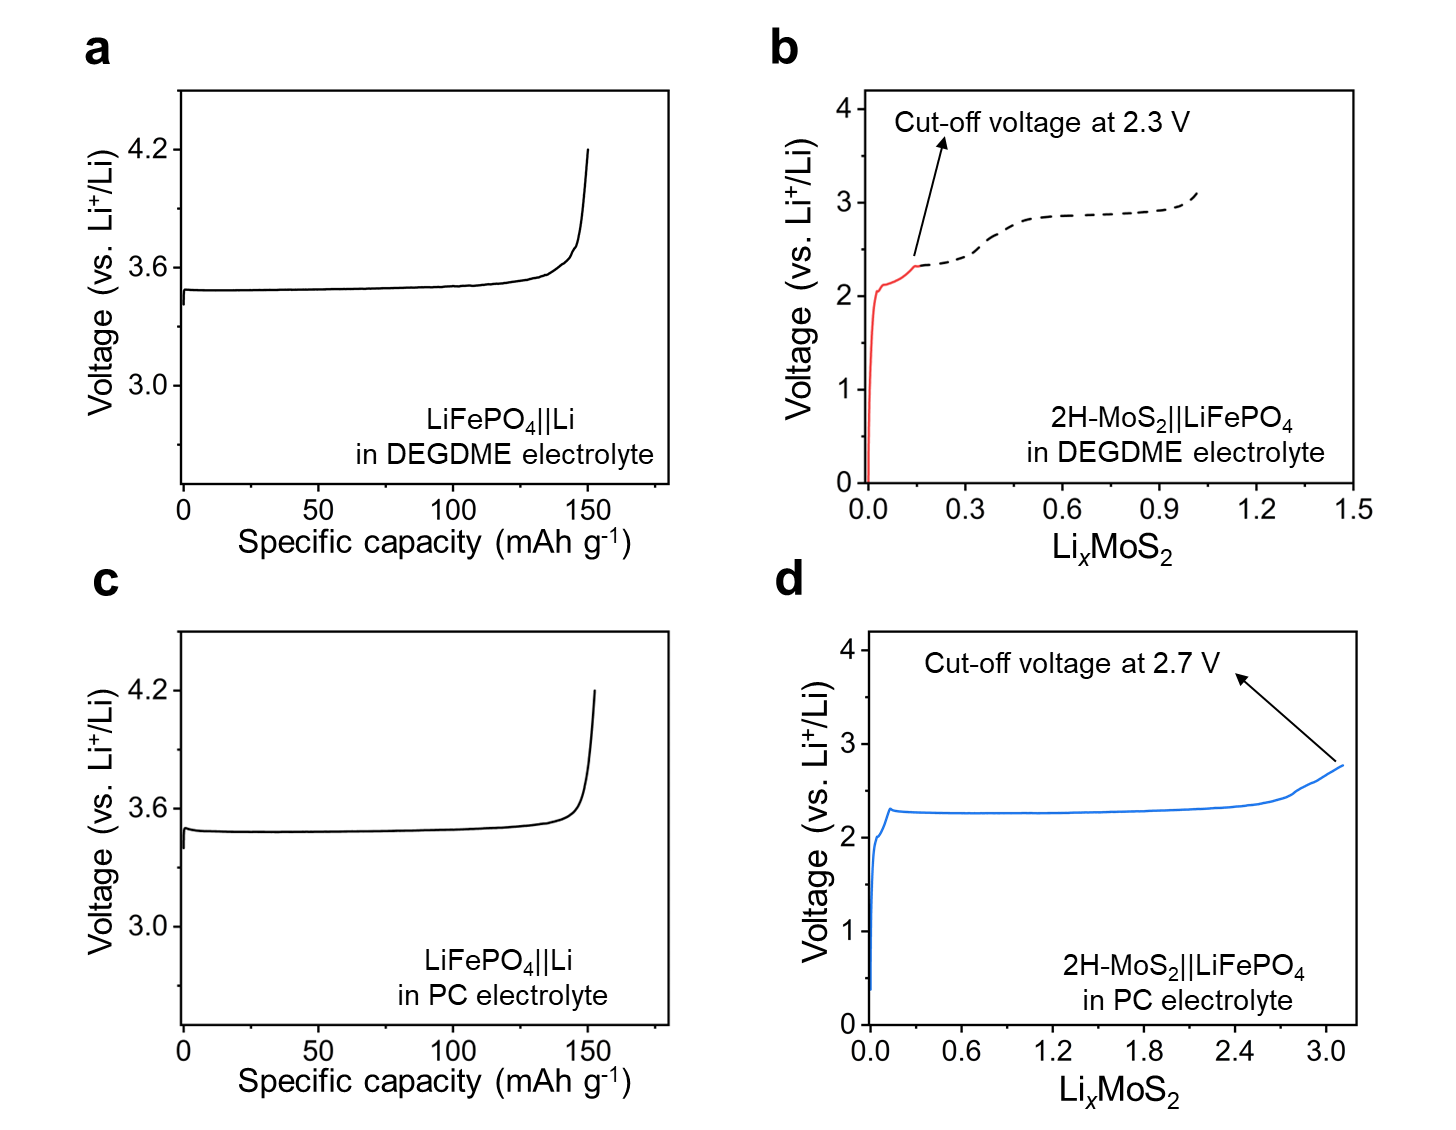


**Supplementary Fig. 30.** **|** **Charge profiles of battery in DEGDME-based and PC-based electrolytes**. **a**,**c** Charge profiles of the LiFePO4||Li battery in DEGDME-based electrolyte (**a**) and PC-based electrolyte (**c**). **b**,**d** Charge profiles of the LiFePO4||MoS2 battery in DEGDME-based electrolyte (**b**) and PC-based electrolyte (**d**) at room temperature. The LiFePO4||MoS2 pouch-type batteries were charged at current density of 0.1 C (1 C = 167.4 mA g-1).


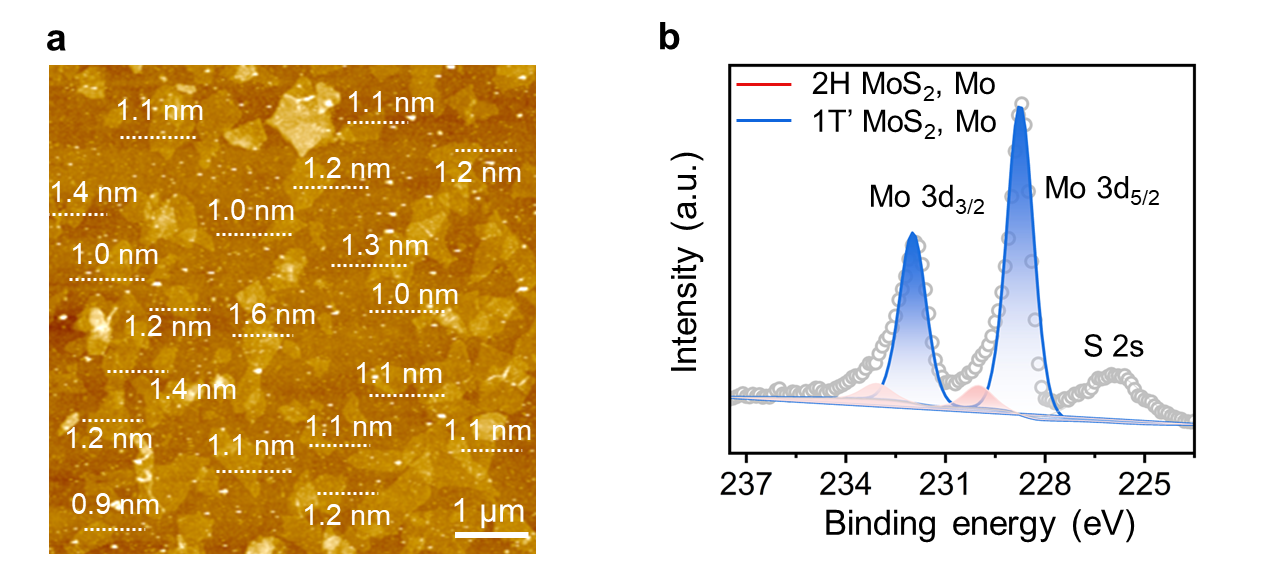


**Supplementary Fig. 31.** **|** **Characterizations of the as-fabricated 2D 1T’-MoS2 NSs**. (**a**) AFM characterizations of 1T’-MoS2. (**b**) High resolution XPS spectra of Mo 3d peaks. The 1T phase proportion in the resultant MoS2 NSs was calculated to be ~98 wt.% based on the deconvolution results of Mo 3d peaks.


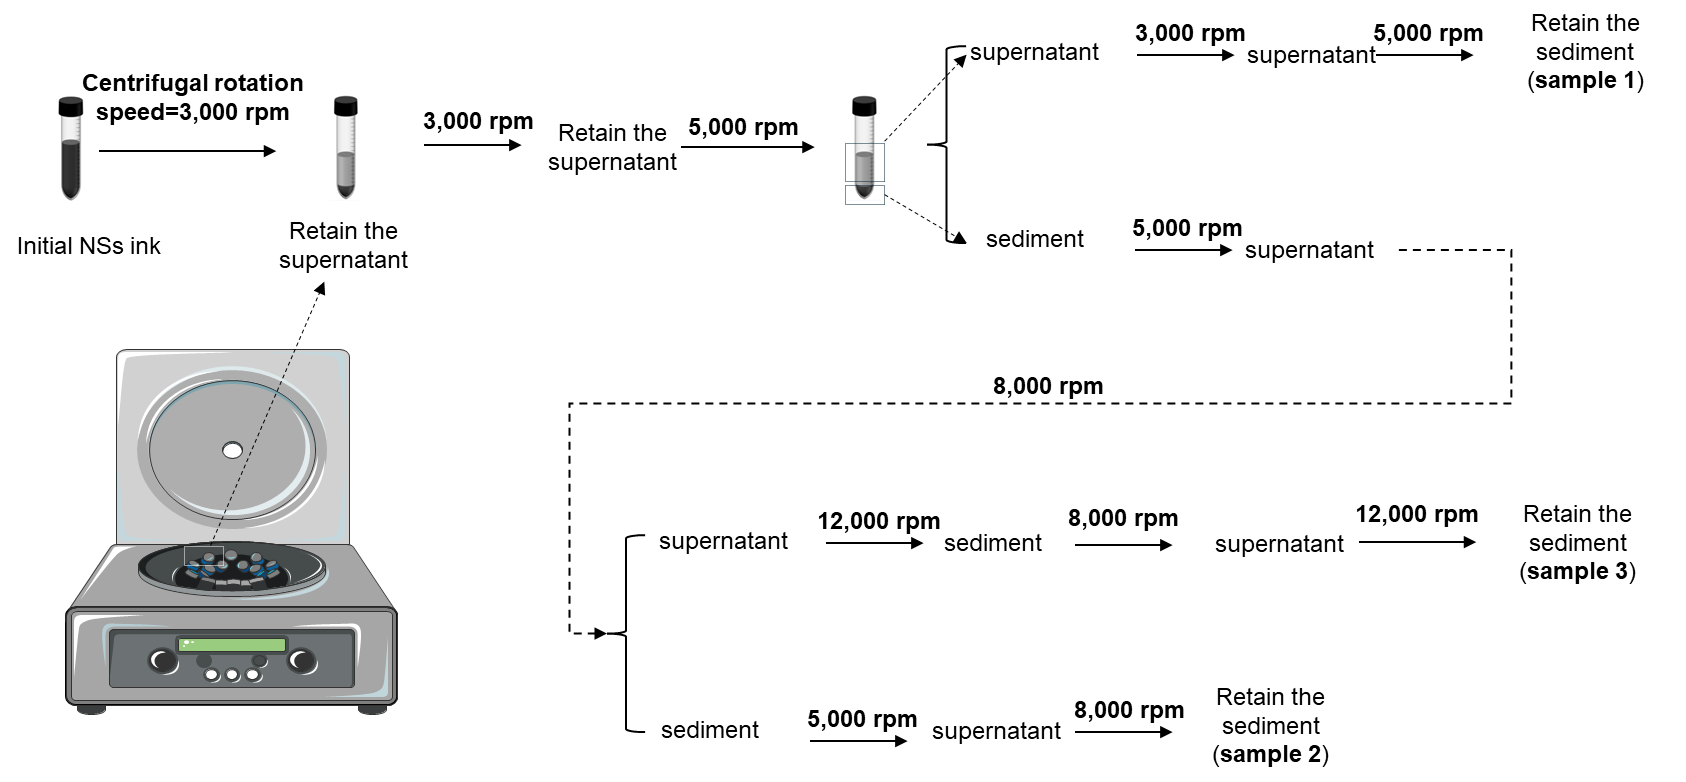


**Supplementary Fig. 32. | Schematic representation of monolayer MoS2 nanosheets with different particle sizes obtained using differential centrifugation.** The nanosheet sediments were collected by alternating high and low rotational speeds between 3000 and 5000 rpm, between 5000 and 8000 rpm, and between 8000 and 12000 rpm, and were recorded as sample 1, sample 2, and sample 3, respectively.


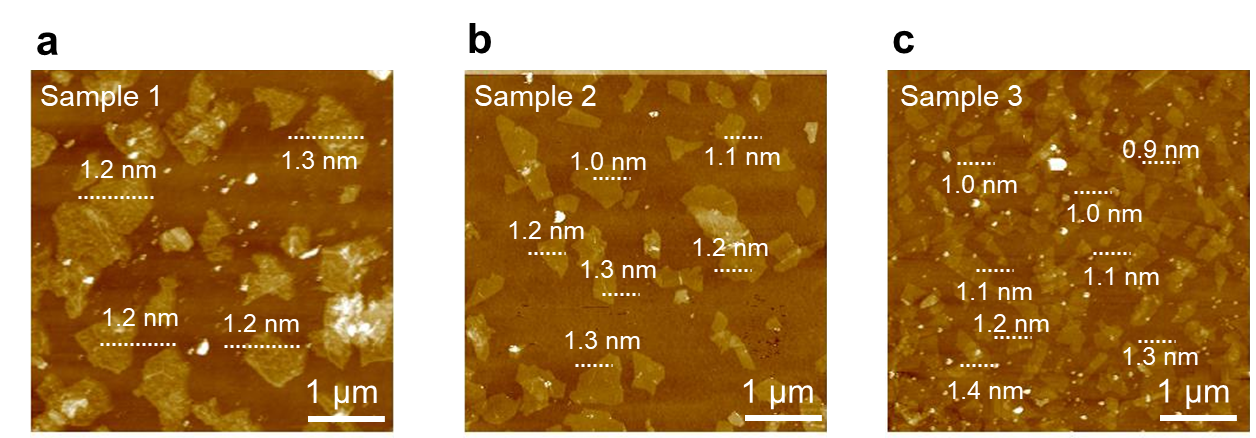


**Supplementary Fig. 33. |** **AFM images of exfoliated 1T’-MoS₂ NSs with measured thicknesses in different sizes**. (**a**) 1T’-MoS2 monolayer with dimensions greater than 1 µm, screened by centrifugation at 3000-5000 rpm. (**b**) 1T’-MoS2 monolayer with dimensions between 500 nm and 1 µm, screened by centrifugation at 5000-8000 rpm. (**c**) 1T’-MoS2 monolayer with dimensions smaller than 500 nm, screened by centrifugation at 8000-12000 rpm. TMDs of the smallest size (like sample 3) screened using differential centrifugation were used for subsequent NO3− reduction reaction.


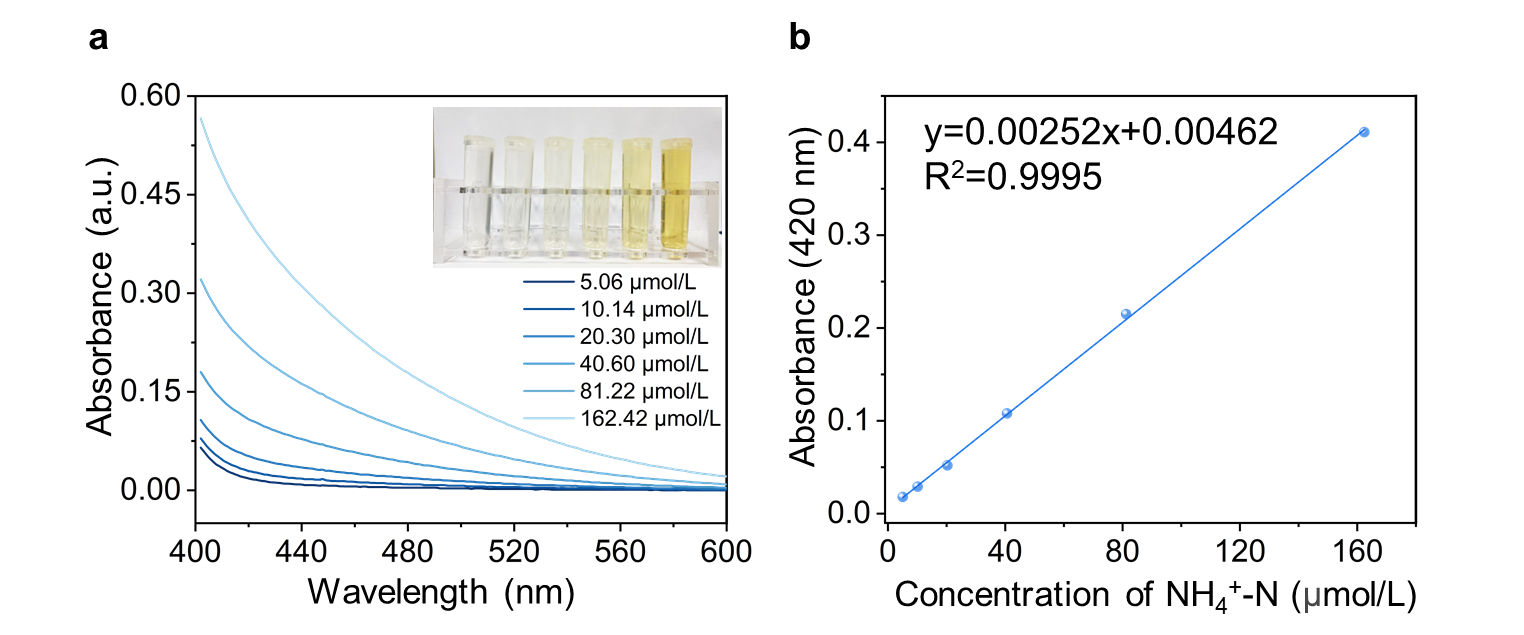


**Supplementary Fig. 34. |** **Standard curves of NH4+-N quantification by the colorimetric method**. (**a**) UV-vis absorption spectroscopy of Nessler Reagent method with different concentrations of NH4+-N, (**b**) the corresponding standard curve. The calibration curve shows good linearity.

**
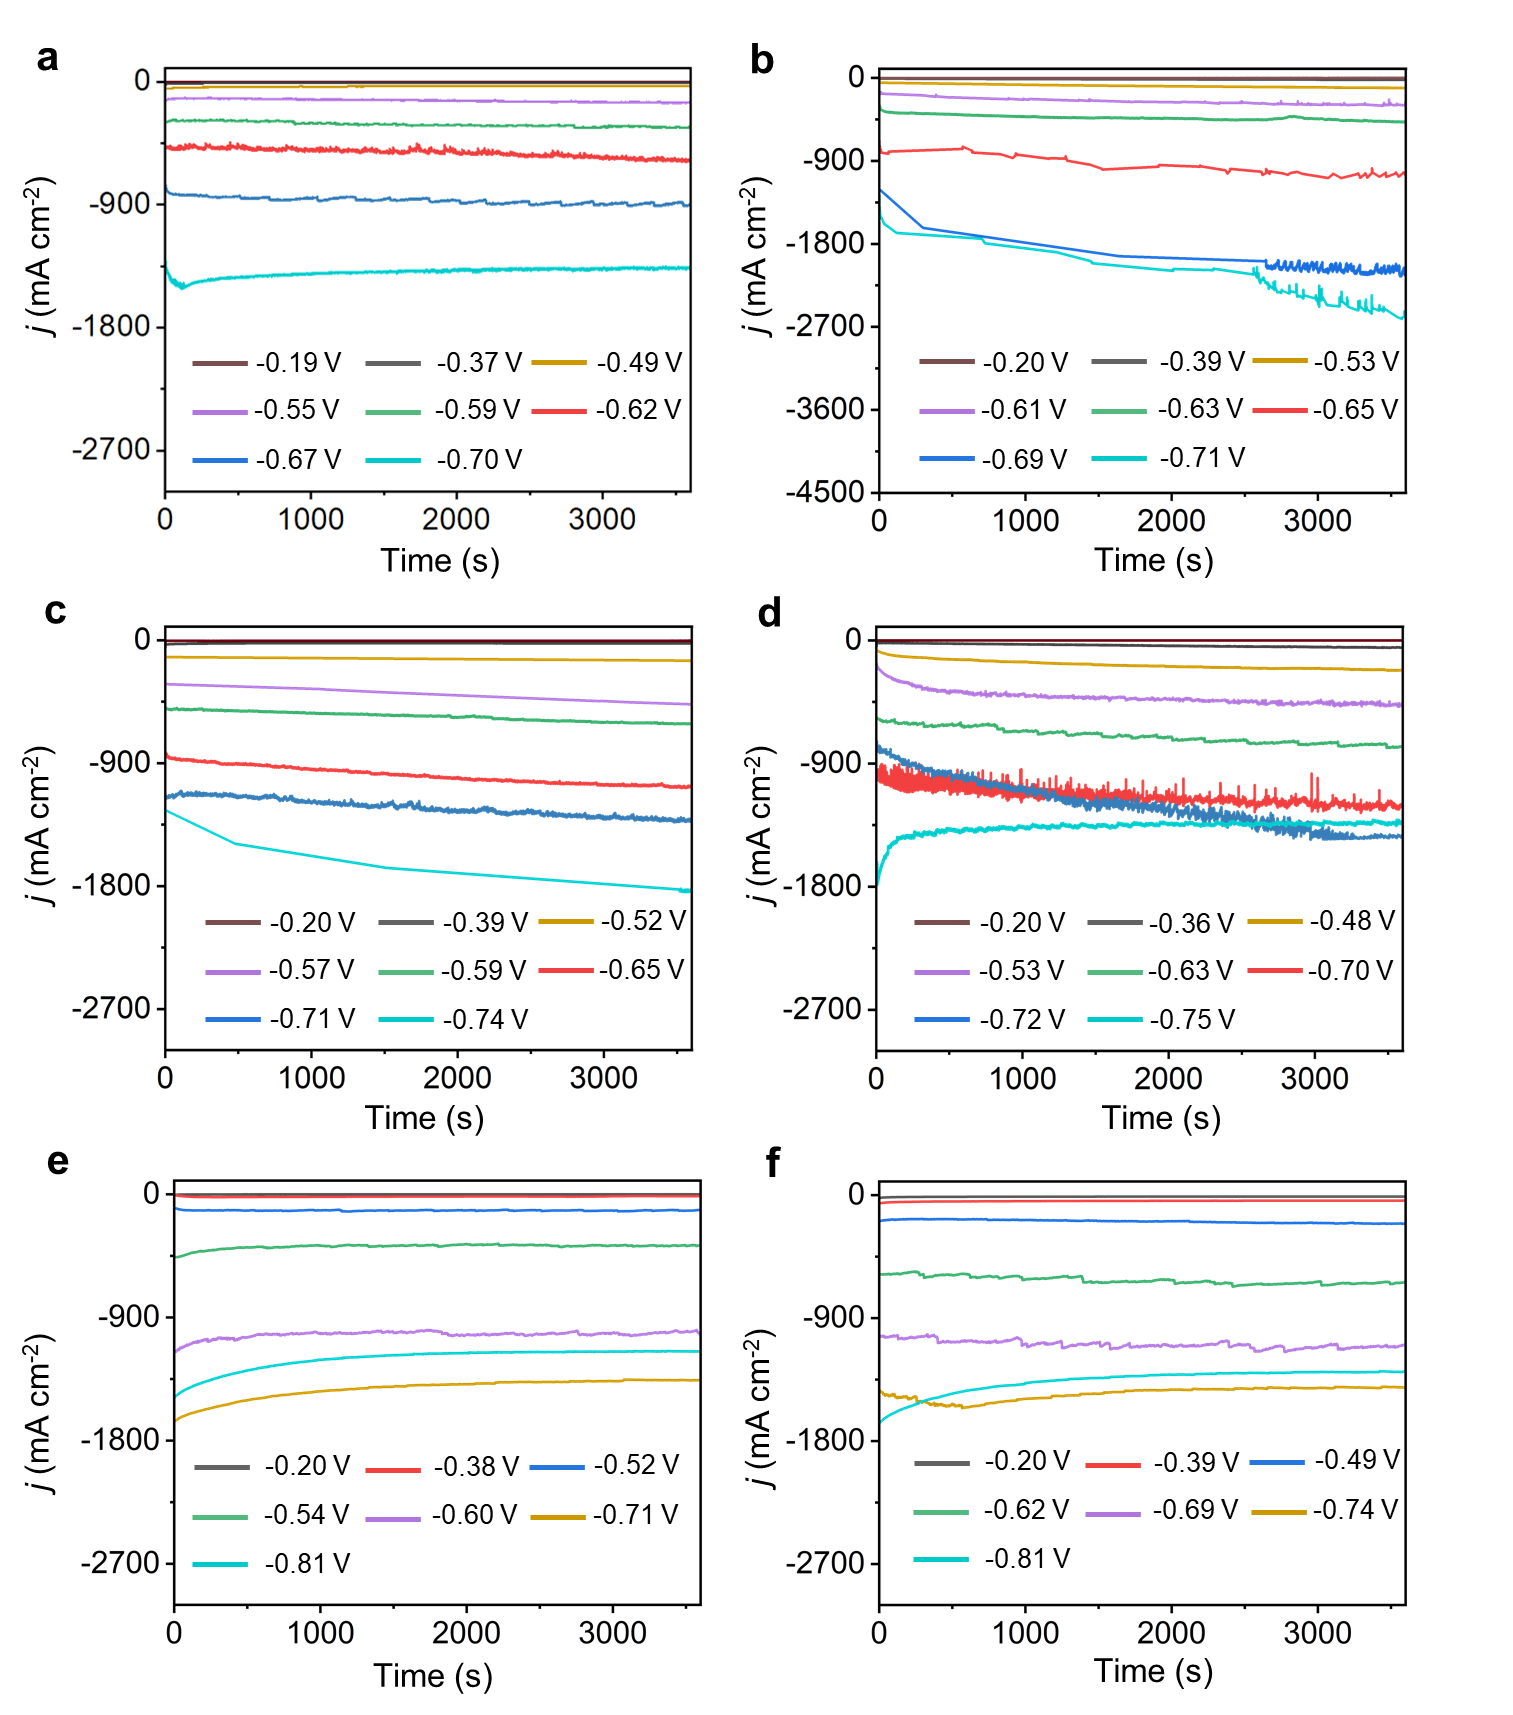
**

**Supplementary Fig. 35. |** Chronoamperometric curves of (**a**) 1T’ MoS2, (**b**) 1T’ WS2, (**c**) 2H MoS2,(**d**) 2H WS2, (**e**) 1T’-MoSe2, and (**f**) 1T’/2H mixed MoS2 nanosheets in at different potentials.





**Supplementary Fig. 36. |** The PDOS of 1T’-WS2, 1T’-MoS2, and 1T’-MoSe2.





**Supplementary Fig. 37. |** The d-band center and p-band center evolutions for 1T’-WS2, 1T’-MoS2 and 1T’-MoSe2.





**Supplementary Fig. 38. |** The PDOS comparisons between 1T’ and 2H phases of MoS2 and WS2.





**Supplementary Fig. 39. |** The energy evolutions for nitrate reduction in 1T’-WS2 and 2H-WS2.

**Supplementary Table S1. |** Comparison of other exfoliation methods with phase-selective exfoliation for producing high-phase purity TMDs nanosheets.

| Method | Phase purity | Thickness (nm) | Scale (g) | Reference |
| --- | --- | --- | --- | --- |
| Phase-selective exfoliation for 1T’ TMDs | 98% | 0.8-1.6 | ~100 | This work |
| Phase-selective exfoliation for 2H TMDs | 100% | 1.3-4.2 | ~100 | This work |
| Li-ion electrochemical exfoliation for 1T’ TMDs | ~72% | 1-2 | <1 | Ref 5 |
| n-BuLi chemical exfoliation for 1T’ TMDs | ~70% | 1-2 | <5 | Ref 6 |
| nap-Li chemical exfoliation for 1T’ TMDs | ~72% | 0.9-1.2 | ~3 | Ref 7 |
| Solid lithiation for exfoliation for 1T’ TMDs | ~80% | 2-14 | ~100 | Ref 8 |
| Solution-processable exfoliation for 2H TMDs | 100% | 0.9-8 | <2.5 | Ref 9 |
| Mild electrochemical exfoliation for 2H TMDs | 100% | 0.8-8 | <5 | Ref 10 |
| Solvent lithium intercalation for exfoliation for 1T’ TMDs | 98% | 0.8-10 | <1 | Ref 11 |
| Solvent lithium intercalation for exfoliation for 2H TMDs | 100% | 0.8-10 | <1 | Ref 11 |
| Solvent-assisted mechanical exfoliation for 2H TMDs | 100% | 2.5-37.5 | <10 | Ref 12 |
| Solid-state ball milling exfoliation for 1T’ TMDs | ~70% | 1-6 | <1 | Ref 13 |
| Redox liquid phase exfoliation for 2H TMDs | 95% | 2-16 | <1 | Ref 14 |
| Intermediate assisted grinding exfoliation for 2H TMDs | 100% | 1-5 | 15 | Ref 15 |

**Supplementary Table S2. |** Detailed information for previously published NO3− reduction reaction catalyst.

| Material | Current density (A cm-2) | NH3 Faraday efficiency | Reference |
| --- | --- | --- | --- |
| 1T’ WS2 | 2.00 | 93.2% | This work |
| 1T’ MoS2 | 1.40 | 90.4% | This work |
| 1T’ MoSe2 | 1.31 | 91.1% | This work |
| 1T’/2H MoS2 | 1.37 | 87.3% | This work |
| Co3O4/Cu-N-C | 1.75 | 76.5% | Ref 16 |
| Ru-CuNW | 1.12 | 93.2% | Ref 17 |
| Bi | 0.95 | 55.1% | Ref 18 |
| Cu/CuAu | 0.68 | 78.5% | Ref 19 |
| CoP-CNS | 0.67 | 87.1% | Ref 20 |
| Ru/Cu | 0.63 | 100% | Ref 21 |
| CuPd | 0.8 | 73.6% | Ref 22 |
| HsGDY@Cu | 0.18 | 92.2% | Ref 23 |
| Cu/Cu2O | 0.13 | 97.1% | Ref 24 |
| I1Cu4 | 0.12 | 85.3% | Ref 25 |
| Ru/RuOx | 0.11 | 80.1% | Ref 26 |
| LF/Cu | 0.011 | 51.2% | Ref 27 |
| CuCoAl | 0.005 | 99.5% | Ref 28 |

NO3− concentration: 0.1 mol L−1 in Ref 23, 0.05 M mol L−1 in Ref 28, 2000 ppm in Ref 17, 200 ppm in Ref 24, 100 ppm in Ref 26, 50 ppm in Ref 27. All other remaining references use 1.0 mol L-1 NO3−.

**Supplementary References**

1 Lin, Y.-C., Dumcenco, D. O., Huang, Y.-S. & Suenaga, K. Atomic mechanism of the semiconducting-to-metallic phase transition in single-layered MoS2. *Nat. Nanotechnol.* **9**, 391-396, (2014).

2 Mei, L. *et al.* Phase-switchable preparation of solution-processable WS2 mono- or bilayers. *Nat. Synth.* **4**, 303-313 (2025).

3 Tan, C. *et al.* Preparation of high-percentage 1T-phase transition metal dichalcogenide nanodots for electrochemical hydrogen evolution. *Adv. Mater.* **30**, 1705509, (2018).

4 Zeng, Z. *et al.* Single-layer semiconducting nanosheets: high-yield preparation and device fabrication. *Angew. Chem. Int. Ed.* **50**, 11093-11097, (2011).

5 Yang, R. *et al.* High-yield production of mono- or few-layer transition metal dichalcogenide nanosheets by an electrochemical lithium ion intercalation-based exfoliation method. *Nat. Protoc.* **17**, 358-377, (2022).

6 Joensen, P., Frindt, R. F. & Morrison, S. R. Single-layer MoS2. *Mater. Res. Bull.* **21**, 457-461, (1986).

7 Zheng, J. *et al.* High yield exfoliation of two-dimensional chalcogenides using sodium naphthalenide. *Nat. Commun.* **5**, 2995, (2014).

8 Zhang, L. *et al.* Metal telluride nanosheets by scalable solid lithiation and exfoliation. *Nature* **628**, 313-319, (2024).

9 Lin, Z. *et al.* Solution-processable 2D semiconductors for high-performance large-area electronics. *Nature* **562**, 254-258, (2018).

10 Li, J. *et al.* Printable two-dimensional superconducting monolayers. *Nat. Mater.* **20**, 181-187, (2021).

11 Peng, J. *et al.* High phase purity of large-sized 1T’-MoS2 monolayers with 2D superconductivity. *Adv. Mater.* **31**, 1900568, (2019).

12 Coleman, J. N. *et al.* Two-dimensional nanosheets produced by liquid exfoliation of layered materials. *Science* **331**, 568-571, (2011).

13 Zhang, L. *et al.* Solid phase exfoliation for producing dispersible transition metal dichalcogenides nanosheets. *Adv. Funct. Mater.* **30**, 2004139, (2020).

14 Jawaid, A. *et al.* Redox exfoliation of layered transition metal dichalcogenides. *ACS Nano* **11**, 635-646, (2017).

15 Zhang, C. *et al.* Mass production of 2D materials by intermediate-assisted grinding exfoliation. *Natl. Sci. Rev.* **7**, 324-332, (2020).

16 Liu, Y. *et al.* Efficient tandem electroreduction of nitrate into ammonia through coupling Cu single atoms with adjacent Co3O4. *Nat. Commun.* **15**, 3619, (2024).

17 Chen, F.-Y. *et al.* Efficient conversion of low-concentration nitrate sources into ammonia on a Ru-dispersed Cu nanowire electrocatalyst. *Nat. Nanotechnol.* **17**, 759-767, (2022).

18 Zhang, N. *et al.* Governing interlayer strain in bismuth nanocrystals for efficient Ammonia electrosynthesis from nitrate reduction. *ACS Nano* **16**, 4795-4804, (2022).

19 Gao, Q. *et al.* Synthesis of core/shell nanocrystals with ordered intermetallic single-atom alloy layers for nitrate electroreduction to ammonia. *Nat. Synth.* **2**, 624-634, (2023).

20 Fan, K. *et al.* Active hydrogen boosts electrochemical nitrate reduction to ammonia. *Nat. Commun.* **13**, 7958, (2022).

21 Hu, Q. *et al.* Ammonia electrosynthesis from nitrate using a ruthenium–copper cocatalyst system: A full concentration range study. *J. Am. Chem. Soc.* **146**, 668-676, (2024).

22 Gao, Q. *et al.* Breaking adsorption-energy scaling limitations of electrocatalytic nitrate reduction on intermetallic CuPd nanocubes by machine-learned insights. *Nat. Commun.* **13**, 2338, (2022).

23 Wang, B. *et al.* Bridging nickel-MOF and copper single atoms/clusters with H-substituted graphdiyne for the tandem catalysis of nitrate to ammonia. *Angew. Chem. Int. Ed.* **63**, e202404819, (2024).

24 Wang, Y., Zhou, W., Jia, R., Yu, Y. & Zhang, B. Unveiling the activity origin of a copper-based electrocatalyst for aelective nitrate reduction to ammonia. *Angew. Chem. Int. Ed.* **59**, 5350-5354, (2020).

25 Zhou, B. *et al.* Reversed I1Cu4 single-atom sites for superior neutral ammonia electrosynthesis with nitrate. *Proc. Nat. Acad. Sci.* **121**, e2405236121, (2024).

26 Li, J. *et al.* Efficient ammonia electrosynthesis from nitrate on strained ruthenium nanoclusters. *J. Am. Chem. Soc.* **142**, 7036-7046, (2020).

27 Chu, K. *et al.* Cation substitution strategy for developing perovskite oxide with rich oxygen vacancy-mediated charge redistribution enables highly efficient nitrate electroreduction to ammonia. *J. Am. Chem. Soc.* **145**, 21387-21396, (2023).

28 Wang, W., Chen, J. & Tse, E. C. M. Synergy between Cu and Co in a layered double hydroxide enables close to 100% nitrate-to-ammonia selectivity. *J. Am. Chem. Soc.* **145**, 26678-26687, (2023).
